# Supplementary material for: A frameshift mutation in MOCOS is associated with familial renal syndrome (xanthinuria) in Tyrolean Grey cattle
Source: PubMed Central journal article supplement (PMC5139135; doi:10.1186/s12917-016-0904-4), 2016-12-05
Supplement: 12917_2016_904_MOESM1_ESM.pdf [file 12917_2016_904_MOESM1_ESM.pdf]

| Chromosome | Marker 1              | Marker 2              | Position 1  | Position 2  | Size (bp)  |
|------------|-----------------------|-----------------------|-------------|-------------|------------|
| 1          | BovineHD0100000005    | BovineHD0100000671    | 16,947      | 2,232,243   | 2,215,296  |
| 2          | BovineHD0200004032    | BovineHD0200006572    | 14,339,349  | 23,166,044  | 8,826,695  |
| 4          | BovineHD0400033946    | BovineHD0400035124    | 116,756,846 | 119,934,128 | 3,177,282  |
| 5          | BovineHD0500036213    | BovineHD0500029694    | 12,188,097  | 13,770,716  | 1,582,619  |
| 5          | BovineHD0500018605    | Hapmap49622-BTA-46973 | 66,516,549  | 68,294,607  | 1,778,058  |
| 6          | BovineHD0600004525    | BovineHD0600005359    | 16,702,620  | 19,302,491  | 2,599,871  |
| 6          | Hapmap42314-BTA-75757 | BovineHD0600010415    | 35,241,752  | 37,560,373  | 2,318,621  |
| 8          | BovineHD0800002913    | BovineHD0800003695    | 9,072,373   | 11,291,753  | 2,219,380  |
| 8          | BovineHD0800031847    | BovineHD0800033100    | 16,622,422  | 19,919,724  | 3,297,302  |
| 8          | BovineHD0800010613    | BovineHD0800015350    | 35,713,716  | 51,204,761  | 15,491,045 |
| 9          | BovineHD0900009868    | BovineHD0900010480    | 35,938,453  | 37,689,610  | 1,751,157  |
| 9          | BovineHD0900015872    | BovineHD0900016281    | 58,017,969  | 59,372,383  | 1,354,414  |
| 9          | BovineHD0900023151    | BovineHD0900023898    | 83,138,608  | 85,242,742  | 2,104,134  |
| 10         | BovineHD1000014018    | BovineHD1000014653    | 46,768,542  | 48,610,685  | 1,842,143  |
| 12         | BovineHD1200006935    | BovineHD1200008102    | 23,082,596  | 27,143,186  | 4,060,590  |
| 12         | BovineHD1200020892    | Hapap27863-BTA-127921 | 75,017,633  | 79,456,283  | 4,438,650  |
| 13         | BovineHD1300002840    | BovineHD1300004479    | 10,445,250  | 15,890,704  | 5,445,454  |
| 14         | BovineHD1400012208    | BovineHD1400013303    | 42,947,530  | 47,012,703  | 4,065,173  |
| 15         | BovineHD1500010919    | BovineHD1500011370    | 39,617,991  | 41,500,113  | 1,882,122  |
| 17         | BovineHD1700007902    | BovineHD1700010837    | 24,929,262  | 39,788,696  | 14,859,434 |
| 17         | BovineHD1700014854    | BovineHD4100013206    | 52,764,123  | 60,673,836  | 7,909,713  |
| 18         | BovineHD1800005514    | BovineHD1800006053    | 10,852,558  | 19,489,001  | 8,636,443  |
| 19         | BovineHD1900004545    | ARS-BFGL-NGS-54750    | 16,477,155  | 18,775,014  | 2,297,859  |
| 19         | BovineHD1900017278    | BovineHD1900018194    | 60,358,453  | 62,991,496  | 2,633,043  |
| 21         | BovineHD2100015375    | BovineHD2100016166    | 53,731,018  | 56,274,431  | 2,543,413  |
| 23         | BovineHD2300002663    | BovineHD2300003693    | 10,851,148  | 14,657,263  | 3,806,115  |
| 24         | BovineHD2400000060    | BovineHD2400001376    | 392,019     | 4,963,234   | 4,571,215  |
| 24         | BovineHD2400007408    | BovineHD2400008718    | 21,002,290  | 32,030,629  | 11,028,339 |
| 24         | BovineHD4100016625    | BovineHD2400011397    | 39,372,536  | 41,143,699  | 1,771,163  |
| 24         | BovineHD2400015944    | BovineHD2400016771    | 55,829,656  | 58,346,014  | 2,516,358  |
| 27         | BovineHD2700009302    | BovineHD2700010132    | 32,923,106  | 35,558,822  | 2,635,716  |

**Additional file 1:**

**Homozygous regions detected in the genome of the two animals with renal syndrome.**
