# Supplementary material for: A frameshift mutation in MOCOS is associated with familial renal syndrome (xanthinuria) in Tyrolean Grey cattle
Source: PubMed Central journal article supplement (PMC5139135; doi:10.1186/s12917-016-0904-4), 2016-12-05
Supplement: 12917_2016_904_MOESM2_ESM.pdf [file 12917_2016_904_MOESM2_ESM.pdf]

Additional file 2:

List of private homozygous sequence variants of the sequenced animal located within homozygous IBD regions. Variants with predicted effects on the protein sequence are presented boldface.

| Chromosome | Position        | REF    | ALT   | EFFECT                                         | IMPACT          | CODON                    | GENE               | BIOTYPE               | TRID                      |
|------------|-----------------|--------|-------|------------------------------------------------|-----------------|--------------------------|--------------------|-----------------------|---------------------------|
| 4          | 117598089       | T      | TC    | intron_variant                                 | MODIFIER        | c.375-5405_375-5404insC  | DPP6               | protein_coding        | ENSBTAT00000029251        |
| 4          | 119134084       | C      | T     | intron_variant                                 | MODIFIER        | c.967-458C>T             | NOM1               | protein_coding        | ENSBTAT00000043572        |
| 6          | 16743580        | TTGA   | T     | upstream_gene_variant                          | MODIFIER        | c.-2888_-2886delTCC      | RRH                | protein_coding        | ENSBTAT00000000997        |
| 6          | 16743580        | TTGA   | T     | downstream_gene_variant                        | MODIFIER        | c.*4440_*4442delTCC      | GAR1               | protein_coding        | ENSBTAT00000000992        |
| 6          | 16823750        | C      | CTATG | upstream_gene_variant                          | MODIFIER        | c.-4986_-4985insTATG     | PLA2G12A           | protein_coding        | ENSBTAT00000020263        |
| 6          | 16919900        | C      | T     | intron_variant                                 | MODIFIER        | c.97-28741G>A            | CCDC109B           | protein_coding        | ENSBTAT00000017276        |
| 6          | 17826103        | G      | A     | downstream_gene_variant                        | MODIFIER        | c.*2047C>T               | RPL34              | protein_coding        | ENSBTAT00000018910        |
| 6          | 17828429        | ATTAAT | A     | intron_variant                                 | MODIFIER        | c.303-200_303-196delATTA | RPL34              | protein_coding        | ENSBTAT00000018910        |
| 6          | 17829011        | T      | C     | intron_variant                                 | MODIFIER        | c.303-777A>G             | RPL34              | protein_coding        | ENSBTAT00000018910        |
| 6          | 17829229        | T      | TC    | intron_variant                                 | MODIFIER        | c.303-996_303-995insG    | RPL34              | protein_coding        | ENSBTAT00000018910        |
| 6          | 17829935        | C      | A     | intron_variant                                 | MODIFIER        | c.302+1182G>T            | RPL34              | protein_coding        | ENSBTAT00000018910        |
| 6          | 17834638        | G      | A     | upstream_gene_variant                          | MODIFIER        | c.-1927C>T               | RPL34              | protein_coding        | ENSBTAT00000018910        |
| 6          | 17837169        | G      | A     | upstream_gene_variant                          | MODIFIER        | c.-4458C>T               | RPL34              | protein_coding        | ENSBTAT00000018910        |
| 6          | 18386511        | C      | T     | intron_variant                                 | MODIFIER        | c.415-25580C>T           | LEP1               | protein_coding        | ENSBTAT00000008991        |
| 8          | 36597460        | G      | A     | intron_variant                                 | MODIFIER        | c.1160-2921G>A           | PTPRD              | protein_coding        | ENSBTAT00000013433        |
| 8          | 36795063        | C      | G     | intron_variant                                 | MODIFIER        | c.5127-103C>G            | PTPRD              | protein_coding        | ENSBTAT00000013433        |
| 8          | 38555403        | C      | T     | intron_variant                                 | MODIFIER        | c.2838+490C>T            | GLDC               | protein_coding        | ENSBTAT00000036700        |
| 8          | 38591977        | T      | A     | intron_variant                                 | MODIFIER        | c.1013+1114C>T           | UHRF2              | protein_coding        | ENSBTAT00000027737        |
| 8          | 38687001        | G      | A     | upstream_gene_variant                          | MODIFIER        | n.2885A>T                | ENSBTAG00000011161 | processed_pseudogene  | ENSBTAT00000014822        |
| 8          | 38687001        | T      | A     | downstream_gene_variant                        | MODIFIER        | c.*4667A>T               | TPD52L3            | protein_coding        | ENSBTAT00000014821        |
| 8          | 38744726        | A      | C     | intron_variant                                 | MODIFIER        | c.-11-296T>G             | IL33               | protein_coding        | ENSBTAT00000024412        |
| 8          | 38754204        | A      | G     | intron_variant                                 | MODIFIER        | c.-167-6891T>C           | IL33               | protein_coding        | ENSBTAT00000024412        |
| 8          | 38754215        | G      | A     | intron_variant                                 | MODIFIER        | c.-167-6902C>T           | IL33               | protein_coding        | ENSBTAT00000024412        |
| 8          | 38793421        | G      | A     | upstream_gene_variant                          | MODIFIER        | c.-49002C>T              | IL33               | protein_coding        | ENSBTAT00000024412        |
| 8          | 38922727        | C      | T     | upstream_gene_variant                          | MODIFIER        | c.-180C>T                | RANBP6             | protein_coding        | ENSBTAT00000016139        |
| 8          | 38929216        | G      | A     | downstream_gene_variant                        | MODIFIER        | c.*2992G>A               | RANBP6             | protein_coding        | ENSBTAT00000016139        |
| 8          | <b>39038055</b> | C      | G     | <b>missense_variant</b>                        | <b>MODERATE</b> | <b>c.926C&gt;G</b>       | <b>KIAA2026</b>    | <b>protein_coding</b> | <b>ENSBTAT00000063356</b> |
| 8          | 39039595        | A      | C     | downstream_gene_variant                        | MODIFIER        | c.*699A>C                | KIAA2026           | protein_coding        | ENSBTAT00000063356        |
| 8          | 39040902        | T      | C     | downstream_gene_variant                        | MODIFIER        | c.*2006T>C               | KIAA2026           | protein_coding        | ENSBTAT00000063356        |
| 8          | 39043867        | C      | T     | downstream_gene_variant                        | MODIFIER        | c.*4971C>T               | KIAA2026           | protein_coding        | ENSBTAT00000063356        |
| 8          | 39052947        | C      | T     | intron_variant                                 | MODIFIER        | c.175-693G>A             | MLANA              | protein_coding        | ENSBTAT00000009784        |
| 8          | 39053495        | C      | T     | intron_variant                                 | MODIFIER        | c.175-1241G>A            | MLANA              | protein_coding        | ENSBTAT00000009784        |
| 8          | 39198684        | T      | G     | intron_variant                                 | MODIFIER        | c.3614-757A>C            | RIC1               | protein_coding        | ENSBTAT00000016922        |
| 8          | 39518556        | A      | C     | upstream_gene_variant                          | MODIFIER        | c.-8302T>G               | PD-L1              | protein_coding        | ENSBTAT00000008067        |
| 8          | 40251861        | G      | A     | intron_variant                                 | MODIFIER        | c.91-1156C>T             | SLC11A1            | protein_coding        | ENSBTAT00000025456        |
| 8          | 40252778        | G      | A     | intron_variant                                 | MODIFIER        | c.91-239C>T              | SLC11A1            | protein_coding        | ENSBTAT00000025456        |
| 8          | 42823339        | T      | C     | intron_variant                                 | MODIFIER        | c.-36-4330A>G            | SMARCA2            | protein_coding        | ENSBTAT00000035681        |
| 8          | 44544016        | C      | T     | intron_variant                                 | MODIFIER        | c.53-1270G>A             | DOCK8              | protein_coding        | ENSBTAT00000002840        |
| 8          | 45214924        | G      | A     | upstream_gene_variant                          | MODIFIER        | c.-55404G>A              | PIPSK1B            | protein_coding        | ENSBTAT00000036688        |
| 8          | 45346048        | A      | G     | downstream_gene_variant                        | MODIFIER        | n.*3487T>C               | snoU13             | snoRNA                | ENSBTAT00000062326        |
| 8          | 45346048        | A      | G     | intron_variant                                 | MODIFIER        | c.1133-3181A>G           | PIPSK1B            | protein_coding        | ENSBTAT00000036688        |
| 8          | 45486980        | A      | G     | upstream_gene_variant                          | MODIFIER        | n.-4873A>G               | 5S_rRNA            | rRNA                  | ENSBTAT00000062666        |
| 8          | 45487146        | G      | C     | upstream_gene_variant                          | MODIFIER        | n.-4707G>C               | 5S_rRNA            | rRNA                  | ENSBTAT00000062666        |
| 8          | 45487179        | G      | A     | upstream_gene_variant                          | MODIFIER        | n.-4674G>A               | 5S_rRNA            | rRNA                  | ENSBTAT00000062666        |
| 8          | 45487597        | G      | C     | upstream_gene_variant                          | MODIFIER        | n.-4256G>C               | 5S_rRNA            | rRNA                  | ENSBTAT00000062666        |
| 8          | 45488763        | G      | A     | upstream_gene_variant                          | MODIFIER        | n.-3090G>A               | 5S_rRNA            | rRNA                  | ENSBTAT00000062666        |
| 8          | 45488904        | C      | T     | upstream_gene_variant                          | MODIFIER        | n.-2949C>T               | 5S_rRNA            | rRNA                  | ENSBTAT00000062666        |
| 8          | 45488969        | C      | T     | upstream_gene_variant                          | MODIFIER        | n.-2884C>T               | 5S_rRNA            | rRNA                  | ENSBTAT00000062666        |
| 8          | 45489561        | T      | G     | upstream_gene_variant                          | MODIFIER        | n.-2292T>G               | 5S_rRNA            | rRNA                  | ENSBTAT00000062666        |
| 8          | 45489698        | G      | A     | upstream_gene_variant                          | MODIFIER        | n.-2155G>A               | 5S_rRNA            | rRNA                  | ENSBTAT00000062666        |
| 8          | 45489803        | G      | A     | upstream_gene_variant                          | MODIFIER        | n.-2050G>A               | 5S_rRNA            | rRNA                  | ENSBTAT00000062666        |
| 8          | 45489842        | G      | A     | upstream_gene_variant                          | MODIFIER        | n.-2011G>A               | 5S_rRNA            | rRNA                  | ENSBTAT00000062666        |
| 8          | 45490008        | G      | T     | upstream_gene_variant                          | MODIFIER        | n.-1845G>T               | 5S_rRNA            | rRNA                  | ENSBTAT00000062666        |
| 8          | 45490195        | A      | C     | upstream_gene_variant                          | MODIFIER        | n.-1658A>C               | 5S_rRNA            | rRNA                  | ENSBTAT00000062666        |
| 8          | 45490197        | A      | G     | upstream_gene_variant                          | MODIFIER        | n.-1656A>G               | 5S_rRNA            | rRNA                  | ENSBTAT00000062666        |
| 8          | 45490756        | A      | T     | upstream_gene_variant                          | MODIFIER        | n.-1097A>T               | 5S_rRNA            | rRNA                  | ENSBTAT00000062666        |
| 8          | 45491283        | AAG    | A     | upstream_gene_variant                          | MODIFIER        | n.-569_-568delAG         | 5S_rRNA            | rRNA                  | ENSBTAT00000062666        |
| 8          | 45491287        | T      | A     | upstream_gene_variant                          | MODIFIER        | n.-566T>A                | 5S_rRNA            | rRNA                  | ENSBTAT00000062666        |
| 8          | 45491306        | C      | T     | upstream_gene_variant                          | MODIFIER        | n.-547C>T                | 5S_rRNA            | rRNA                  | ENSBTAT00000062666        |
| 8          | 45492214        | C      | T     | downstream_gene_variant                        | MODIFIER        | n.*269C>T                | 5S_rRNA            | rRNA                  | ENSBTAT00000062666        |
| 8          | 45492951        | T      | C     | downstream_gene_variant                        | MODIFIER        | n.*1006T>C               | 5S_rRNA            | rRNA                  | ENSBTAT00000062666        |
| 8          | 45493363        | T      | G     | downstream_gene_variant                        | MODIFIER        | n.*1418T>G               | 5S_rRNA            | rRNA                  | ENSBTAT00000062666        |
| 8          | 45493378        | G      | A     | downstream_gene_variant                        | MODIFIER        | n.*1433G>A               | 5S_rRNA            | rRNA                  | ENSBTAT00000062666        |
| 8          | 45493436        | A      | G     | downstream_gene_variant                        | MODIFIER        | n.*1491A>G               | 5S_rRNA            | rRNA                  | ENSBTAT00000062666        |
| 8          | 45493720        | A      | C     | downstream_gene_variant                        | MODIFIER        | n.*1775A>C               | 5S_rRNA            | rRNA                  | ENSBTAT00000062666        |
| 8          | 45494116        | T      | C     | downstream_gene_variant                        | MODIFIER        | n.*2171T>C               | 5S_rRNA            | rRNA                  | ENSBTAT00000062666        |
| 8          | 45494191        | C      | G     | downstream_gene_variant                        | MODIFIER        | n.*2246C>G               | 5S_rRNA            | rRNA                  | ENSBTAT00000062666        |
| 8          | 45494197        | G      | A     | downstream_gene_variant                        | MODIFIER        | n.*2252G>A               | 5S_rRNA            | rRNA                  | ENSBTAT00000062666        |
| 8          | 45494347        | C      | T     | downstream_gene_variant                        | MODIFIER        | n.*2402C>T               | 5S_rRNA            | rRNA                  | ENSBTAT00000062666        |
| 8          | 45494404        | A      | G     | downstream_gene_variant                        | MODIFIER        | n.*2459A>G               | 5S_rRNA            | rRNA                  | ENSBTAT00000062666        |
| 8          | 45494522        | T      | C     | downstream_gene_variant                        | MODIFIER        | n.*2577T>C               | 5S_rRNA            | rRNA                  | ENSBTAT00000062666        |
| 8          | 45494545        | G      | A     | downstream_gene_variant                        | MODIFIER        | n.*2600G>A               | 5S_rRNA            | rRNA                  | ENSBTAT00000062666        |
| 8          | 45495136        | G      | A     | downstream_gene_variant                        | MODIFIER        | n.*3191G>A               | 5S_rRNA            | rRNA                  | ENSBTAT00000062666        |
| 8          | 45495177        | C      | T     | downstream_gene_variant                        | MODIFIER        | n.*3232C>T               | 5S_rRNA            | rRNA                  | ENSBTAT00000062666        |
| 8          | 45495679        | T      | C     | downstream_gene_variant                        | MODIFIER        | n.*3734T>C               | 5S_rRNA            | rRNA                  | ENSBTAT00000062666        |
| 8          | 45496266        | A      | C     | downstream_gene_variant                        | MODIFIER        | n.*4321A>C               | 5S_rRNA            | rRNA                  | ENSBTAT00000062666        |
| 8          | 45496347        | T      | C     | downstream_gene_variant                        | MODIFIER        | n.*4402T>C               | 5S_rRNA            | rRNA                  | ENSBTAT00000062666        |
| 8          | 45496486        | C      | T     | downstream_gene_variant                        | MODIFIER        | n.*4541C>T               | 5S_rRNA            | rRNA                  | ENSBTAT00000062666        |
| 8          | 45496532        | G      | A     | downstream_gene_variant                        | MODIFIER        | n.*4587G>A               | 5S_rRNA            | rRNA                  | ENSBTAT00000062666        |
| 8          | 45496603        | T      | C     | downstream_gene_variant                        | MODIFIER        | n.*4658T>C               | 5S_rRNA            | rRNA                  | ENSBTAT00000062666        |
| 8          | 45496770        | G      | A     | downstream_gene_variant                        | MODIFIER        | n.*4825G>A               | 5S_rRNA            | rRNA                  | ENSBTAT00000062666        |
| 8          | 45496785        | A      | G     | downstream_gene_variant                        | MODIFIER        | n.*4840A>G               | 5S_rRNA            | rRNA                  | ENSBTAT00000062666        |
| 8          | 45499073        | G      | A     | upstream_gene_variant                          | MODIFIER        | c.-4928G>A               | FXN                | protein_coding        | ENSBTAT00000001725        |
| 8          | 45499525        | T      | C     | upstream_gene_variant                          | MODIFIER        | c.-4476T>C               | FXN                | protein_coding        | ENSBTAT00000001725        |
| 8          | 45503463        | A      | G     | upstream_gene_variant                          | MODIFIER        | c.-538A>G                | FXN                | protein_coding        | ENSBTAT00000001725        |
| 8          | 45503482        | A      | G     | upstream_gene_variant                          | MODIFIER        | c.-519A>G                | FXN                | protein_coding        | ENSBTAT00000001725        |
| 8          | 45503499        | C      | G     | upstream_gene_variant                          | MODIFIER        | c.-502C>G                | FXN                | protein_coding        | ENSBTAT00000001725        |
| 8          | 45503952        | T      | C     | upstream_gene_variant                          | MODIFIER        | c.-49T>C                 | FXN                | protein_coding        | ENSBTAT00000001725        |
| 8          | 45503984        | C      | T     | 5_prime_UTR_premature_start_codon_gain_variant | LOW             | c.-17C>T                 | FXN                | protein_coding        | ENSBTAT00000001725        |
| 8          | 45503984        | C      | T     | 5_prime_UTR_variant                            | MODIFIER        | c.-17C>T                 | FXN                | protein_coding        | ENSBTAT00000001725        |
| 8          | 45504858        | T      | C     | intron_variant                                 | MODIFIER        | c.168+690T>C             | FXN                | protein_coding        | ENSBTAT00000001725        |
| 8          | 45504871        | A      | C     | intron_variant                                 | MODIFIER        | c.168+703A>C             | FXN                | protein_coding        | ENSBTAT00000001725        |
| 8          | 45505013        | A      | G     | intron_variant                                 | MODIFIER        | c.168+845A>G             | FXN                | protein_coding        | ENSBTAT00000001725        |
| 8          | 45505089        | C      | T     | intron_variant                                 | MODIFIER        | c.168+921C>T             | FXN                | protein_coding        | ENSBTAT00000001725        |
| 8          | 45505493        | C      | T     | intron_variant                                 | MODIFIER        | c.168+1325C>T            | FXN                | protein_coding        | ENSBTAT00000001725        |
| 8          | 45505494        | A      | G     | intron_variant                                 | MODIFIER        | c.168+1326A>G            | FXN                | protein_coding        | ENSBTAT00000001725        |
| 8          | 45505524        | A      | C     | intron_variant                                 | MODIFIER        | c.168+1356A>C            | FXN                | protein_coding        | ENSBTAT00000001725        |
| 8          | 45505527        | T      | C     | intron_variant                                 | MODIFIER        | c.168+1359T>C            | FXN                | protein_coding        | ENSBTAT00000001725        |
| 8          | 45505557        | T      | G     | intron_variant                                 | MODIFIER        | c.168+1389T>G            | FXN                | protein_coding        | ENSBTAT00000001725        |
| 8          | 45505558        | CG     | C     | intron_variant                                 | MODIFIER        | c.168+1391delG           | FXN                | protein_coding        | ENSBTAT00000001725        |
| 8          | 45505598        | A      | G     | intron_variant                                 | MODIFIER        | c.168+1430A>G            | FXN                | protein_coding        | ENSBTAT00000001725        |
| 8          | 45505697        | C      | T     | intron_variant                                 | MODIFIER        | c.168+1529C>T            | FXN                | protein_coding        | ENSBTAT00000001725        |
| 8          | 45505703        | C      | T     | intron_variant                                 | MODIFIER        | c.168+1535C>T            | FXN                | protein_coding        | ENSBTAT00000001725        |
| 8          | 45505726        | A      | G     | intron_variant                                 | MODIFIER        | c.168+1558A>G            | FXN                | protein_coding        | ENSBTAT00000001725        |
| 8          | 45505775        | G      | A     | intron_variant                                 | MODIFIER        | c.168+1607G>A            | FXN                | protein_coding        | ENSBTAT00000001725        |
| 8          | 45505828        | GC     | G     | intron_variant                                 | MODIFIER        | c.168+1661delC           | FXN                | protein_coding        | ENSBTAT00000001725        |
| 8          | 45505832        | C      | T     | intron_variant                                 | MODIFIER        | c.168+1664C>T            | FXN                | protein_coding        | ENSBTAT00000001725        |
| 8          |                 |        |       |                                                |                 |                          |                    |                       |                           |

|    |          |     |    |                         |          |                            |                    |                |                     |
|----|----------|-----|----|-------------------------|----------|----------------------------|--------------------|----------------|---------------------|
| 8  | 45505849 | C   | A  | intron_variant          | MODIFIER | c.168+1681C>A              | FXN                | protein_coding | ENSBTAT00000001725  |
| 8  | 45505852 | T   | A  | intron_variant          | MODIFIER | c.168+1684T>A              | FXN                | protein_coding | ENSBTAT00000001725  |
| 8  | 45505857 | T   | C  | intron_variant          | MODIFIER | c.168+1689T>C              | FXN                | protein_coding | ENSBTAT00000001725  |
| 8  | 45505924 | A   | G  | intron_variant          | MODIFIER | c.168+1756A>G              | FXN                | protein_coding | ENSBTAT00000001725  |
| 8  | 45505935 | G   | C  | intron_variant          | MODIFIER | c.168+1767G>C              | FXN                | protein_coding | ENSBTAT00000001725  |
| 8  | 45505936 | A   | AT | intron_variant          | MODIFIER | c.168+1768_168+1769insT    | FXN                | protein_coding | ENSBTAT00000001725  |
| 8  | 45505955 | C   | A  | intron_variant          | MODIFIER | c.168+1787C>A              | FXN                | protein_coding | ENSBTAT00000001725  |
| 8  | 45505980 | T   | C  | intron_variant          | MODIFIER | c.168+1812T>C              | FXN                | protein_coding | ENSBTAT00000001725  |
| 8  | 45506047 | T   | G  | intron_variant          | MODIFIER | c.168+1879T>G              | FXN                | protein_coding | ENSBTAT00000001725  |
| 8  | 45506251 | C   | T  | intron_variant          | MODIFIER | c.168+2083C>T              | FXN                | protein_coding | ENSBTAT00000001725  |
| 8  | 45506707 | C   | T  | intron_variant          | MODIFIER | c.168+2539C>T              | FXN                | protein_coding | ENSBTAT00000001725  |
| 8  | 45506743 | G   | C  | intron_variant          | MODIFIER | c.168+2575G>C              | FXN                | protein_coding | ENSBTAT00000001725  |
| 8  | 45507034 | C   | T  | intron_variant          | MODIFIER | c.169-2297C>T              | FXN                | protein_coding | ENSBTAT00000001725  |
| 8  | 45507145 | C   | T  | intron_variant          | MODIFIER | c.169-2186C>T              | FXN                | protein_coding | ENSBTAT00000001725  |
| 8  | 45507277 | T   | C  | intron_variant          | MODIFIER | c.169-2054T>C              | FXN                | protein_coding | ENSBTAT00000001725  |
| 8  | 45507459 | G   | T  | intron_variant          | MODIFIER | c.169-1872G>T              | FXN                | protein_coding | ENSBTAT00000001725  |
| 8  | 45507524 | C   | T  | intron_variant          | MODIFIER | c.169-1807C>T              | FXN                | protein_coding | ENSBTAT00000001725  |
| 8  | 45507695 | A   | G  | intron_variant          | MODIFIER | c.169-1636A>G              | FXN                | protein_coding | ENSBTAT00000001725  |
| 8  | 45507715 | T   | C  | intron_variant          | MODIFIER | c.169-1616T>C              | FXN                | protein_coding | ENSBTAT00000001725  |
| 8  | 45507894 | T   | G  | intron_variant          | MODIFIER | c.169-1437T>G              | FXN                | protein_coding | ENSBTAT00000001725  |
| 8  | 45509017 | A   | G  | intron_variant          | MODIFIER | c.169-3144A>G              | FXN                | protein_coding | ENSBTAT00000001725  |
| 8  | 45509018 | C   | T  | intron_variant          | MODIFIER | c.169-313C>T               | FXN                | protein_coding | ENSBTAT00000001725  |
| 8  | 45510634 | C   | A  | intron_variant          | MODIFIER | c.266+1206C>A              | FXN                | protein_coding | ENSBTAT00000001725  |
| 8  | 45510648 | C   | T  | intron_variant          | MODIFIER | c.266+1220C>T              | FXN                | protein_coding | ENSBTAT00000001725  |
| 8  | 45510728 | C   | T  | intron_variant          | MODIFIER | c.266+1300C>T              | FXN                | protein_coding | ENSBTAT00000001725  |
| 8  | 45512468 | G   | C  | intron_variant          | MODIFIER | c.267-2206G>C              | FXN                | protein_coding | ENSBTAT00000001725  |
| 8  | 45514964 | G   | C  | intron_variant          | MODIFIER | c.387+170G>C               | FXN                | protein_coding | ENSBTAT00000001725  |
| 8  | 45516225 | T   | C  | intron_variant          | MODIFIER | c.387+1431T>C              | FXN                | protein_coding | ENSBTAT00000001725  |
| 8  | 45517774 | G   | A  | intron_variant          | MODIFIER | c.387+2980G>A              | FXN                | protein_coding | ENSBTAT00000001725  |
| 8  | 45519408 | G   | A  | intron_variant          | MODIFIER | c.388-1815G>A              | FXN                | protein_coding | ENSBTAT00000001725  |
| 8  | 45519633 | G   | A  | intron_variant          | MODIFIER | c.388-1590G>A              | FXN                | protein_coding | ENSBTAT00000001725  |
| 8  | 45528856 | T   | C  | downstream_gene_variant | MODIFIER | c.*1356T>C                 | FXN                | protein_coding | ENSBTAT00000001725  |
| 8  | 45878592 | G   | A  | intron_variant          | MODIFIER | c.2175+1225C>T             | APBA1              | protein_coding | ENSBTAT00000001688  |
| 8  | 46635751 | A   | C  | intron_variant          | MODIFIER | c.1019-2060A>C             | MAMDC2             | protein_coding | ENSBTAT00000023092  |
| 8  | 46686651 | T   | C  | intron_variant          | MODIFIER | c.1792-2570T>C             | MAMDC2             | protein_coding | ENSBTAT00000023092  |
| 8  | 47051771 | G   | T  | intron_variant          | MODIFIER | c.3133+20382C>A            | TRPM3              | protein_coding | ENSBTAT00000005117  |
| 8  | 48435328 | A   | C  | intron_variant          | MODIFIER | c.-3-19258T>C              | FAM108B1           | protein_coding | ENSBTAT00000008957  |
| 8  | 48453730 | C   | G  | upstream_gene_variant   | MODIFIER | c.-2680C>G                 | C8H9ORF85          | protein_coding | ENSBTAT00000008975  |
| 8  | 48453730 | C   | G  | intron_variant          | MODIFIER | c.-4+1578G>C               | FAM108B1           | protein_coding | ENSBTAT00000008957  |
| 8  | 48481515 | C   | CA | intron_variant          | MODIFIER | c.103-9678_103-9677insA    | C8H9ORF85          | protein_coding | ENSBTAT00000008975  |
| 8  | 48701986 | G   | C  | intron_variant          | MODIFIER | c.124-27302G>C             | GDA                | protein_coding | ENSBTAT00000015339  |
| 8  | 48762541 | CA  | C  | intron_variant          | MODIFIER | c.988+3212delA             | GDA                | protein_coding | ENSBTAT00000015339  |
| 9  | 36713660 | T   | C  | intron_variant          | MODIFIER | c.-145-14269T>C            | HS3ST5             | protein_coding | ENSBTAT0000000213   |
| 9  | 36774504 | G   | A  | intron_variant          | MODIFIER | c.-33-46463G>A             | HS3ST5             | protein_coding | ENSBTAT0000000213   |
| 9  | 36775751 | G   | C  | intron_variant          | MODIFIER | c.-33+47710G>C             | HS3ST5             | protein_coding | ENSBTAT0000000213   |
| 9  | 36779755 | TC  | T  | intron_variant          | MODIFIER | c.-33+51715delC            | HS3ST5             | protein_coding | ENSBTAT0000000213   |
| 9  | 36792378 | C   | A  | intron_variant          | MODIFIER | c.-32-46312C>A             | HS3ST5             | protein_coding | ENSBTAT0000000213   |
| 9  | 36793282 | G   | A  | intron_variant          | MODIFIER | c.-32-45408G>A             | HS3ST5             | protein_coding | ENSBTAT0000000213   |
| 9  | 36793689 | A   | C  | intron_variant          | MODIFIER | c.-32-45001A>C             | HS3ST5             | protein_coding | ENSBTAT0000000213   |
| 10 | 47533504 | A   | G  | intron_variant          | MODIFIER | c.-36-19403T>C             | TLN2               | protein_coding | ENSBTAT00000006137  |
| 10 | 47961801 | CAT | C  | downstream_gene_variant | MODIFIER | c.*4412_.*4413delAT        | C2CD4A             | protein_coding | ENSBTAT00000027236  |
| 10 | 48248855 | CTG | C  | intron_variant          | MODIFIER | c.10012-144_10012-143delTG | VPS13C             | protein_coding | ENSBTAT000000061287 |
| 12 | 24156210 | C   | G  | intron_variant          | MODIFIER | c.1241-5105C>G             | TRPC4              | protein_coding | ENSBTAT00000012378  |
| 12 | 78059230 | C   | T  | upstream_gene_variant   | MODIFIER | c.-4614C>T                 | OXGR1              | protein_coding | ENSBTAT00000035454  |
| 12 | 79380842 | C   | T  | intron_variant          | MODIFIER | c.1417+5538C>T             | ENSBTAG00000000146 | protein_coding | ENSBTAT00000000167  |
| 12 | 79380887 | C   | T  | intron_variant          | MODIFIER | c.1417+5583C>T             | ENSBTAG00000000146 | protein_coding | ENSBTAT00000000167  |
| 12 | 79381341 | C   | T  | intron_variant          | MODIFIER | c.1417+6037C>T             | ENSBTAG00000000146 | protein_coding | ENSBTAT00000000167  |
| 13 | 10945513 | A   | G  | intron_variant          | MODIFIER | c.280+2886A>G              | ENSBTAG00000023169 | protein_coding | ENSBTAT00000050711  |
| 13 | 10955908 | C   | A  | intron_variant          | MODIFIER | c.865-591C>A               | ENSBTAG00000023169 | protein_coding | ENSBTAT00000050711  |
| 13 | 10968546 | G   | A  | intron_variant          | MODIFIER | c.1678-677G>A              | ENSBTAG00000023169 | protein_coding | ENSBTAT00000050711  |
| 13 | 11329141 | G   | C  | intron_variant          | MODIFIER | c.706-605G>C               | ANKRD26            | protein_coding | ENSBTAT000000031151 |
| 13 | 11329141 | G   | C  | intron_variant          | MODIFIER | c.299+122G>C               | ANKRD26            | protein_coding | ENSBTAT00000055503  |
| 13 | 12298609 | TA  | T  | intron_variant          | MODIFIER | c.2323-470delTT            | DHTKD1             | protein_coding | ENSBTAT00000000364  |
| 14 | 44970900 | C   | T  | intron_variant          | MODIFIER | c.19-1776C>T               | STMN2              | protein_coding | ENSBTAT00000026776  |
| 14 | 45297375 | T   | C  | intron_variant          | MODIFIER | c.399-17785A>G             | MRPS28             | protein_coding | ENSBTAT00000001718  |
| 14 | 45352499 | G   | C  | intron_variant          | MODIFIER | c.399-72909C>G             | MRPS28             | protein_coding | ENSBTAT00000001718  |
| 14 | 45413670 | G   | A  | intron_variant          | MODIFIER | c.398+61892C>T             | MRPS28             | protein_coding | ENSBTAT00000001718  |
| 14 | 45442660 | C   | T  | intron_variant          | MODIFIER | c.398+32902G>A             | MRPS28             | protein_coding | ENSBTAT00000001718  |
| 14 | 45504865 | C   | A  | intron_variant          | MODIFIER | c.624+312G>T               | TPD52              | protein_coding | ENSBTAT00000055321  |
| 14 | 45504865 | C   | A  | intron_variant          | MODIFIER | c.435+312G>T               | TPD52              | protein_coding | ENSBTAT00000054316  |
| 14 | 45504865 | C   | A  | intron_variant          | MODIFIER | c.555+312G>T               | TPD52              | protein_coding | ENSBTAT00000037262  |
| 14 | 45830553 | T   | A  | intron_variant          | MODIFIER | c.966+1659T>A              | ZBTB10             | protein_coding | ENSBTAT00000004333  |
| 14 | 45830774 | T   | TC | intron_variant          | MODIFIER | c.966+1880_966+1881insC    | ZBTB10             | protein_coding | ENSBTAT00000004333  |
| 14 | 45992939 | C   | T  | downstream_gene_variant | MODIFIER | c.*2438G>A                 | ZNF704             | protein_coding | ENSBTAT00000028982  |
| 14 | 45995373 | C   | A  | 3_prime_UTR_variant     | MODIFIER | c.*4G>T                    | ZNF704             | protein_coding | ENSBTAT00000028982  |
| 14 | 45995671 | A   | G  | intron_variant          | MODIFIER | c.915-183T>C               | ZNF704             | protein_coding | ENSBTAT00000028982  |
| 14 | 45995787 | A   | T  | intron_variant          | MODIFIER | c.915-299T>C               | ZNF704             | protein_coding | ENSBTAT00000028982  |
| 14 | 45996342 | G   | A  | intron_variant          | MODIFIER | c.914+121C>T               | ZNF704             | protein_coding | ENSBTAT00000028982  |
| 14 | 45997060 | G   | A  | intron_variant          | MODIFIER | c.817-500C>T               | ZNF704             | protein_coding | ENSBTAT00000028982  |
| 14 | 45998126 | T   | C  | intron_variant          | MODIFIER | c.817-1566A>G              | ZNF704             | protein_coding | ENSBTAT00000028982  |
| 14 | 46002274 | C   | T  | intron_variant          | MODIFIER | c.817-3714G>A              | ZNF704             | protein_coding | ENSBTAT00000028982  |
| 14 | 46002999 | C   | G  | intron_variant          | MODIFIER | c.816+4874G>C              | ZNF704             | protein_coding | ENSBTAT00000028982  |
| 14 | 46007734 | A   | T  | intron_variant          | MODIFIER | c.712-457T>A               | ZNF704             | protein_coding | ENSBTAT00000028982  |
| 14 | 46008281 | A   | T  | intron_variant          | MODIFIER | c.712-1004T>A              | ZNF704             | protein_coding | ENSBTAT00000028982  |
| 14 | 46008596 | C   | T  | intron_variant          | MODIFIER | c.711-934G>C               | ZNF704             | protein_coding | ENSBTAT00000028982  |
| 14 | 46009058 | C   | T  | intron_variant          | MODIFIER | c.711+472G>A               | ZNF704             | protein_coding | ENSBTAT00000028982  |
| 14 | 46009479 | C   | T  | intron_variant          | MODIFIER | c.711+51G>A                | ZNF704             | protein_coding | ENSBTAT00000028982  |
| 14 | 46009512 | T   | C  | intron_variant          | MODIFIER | c.711+18A>G                | ZNF704             | protein_coding | ENSBTAT00000028982  |
| 14 | 46009656 | G   | A  | synonymous_variant      | LOW      | c.585C>T                   | ZNF704             | protein_coding | ENSBTAT00000028982  |
| 14 | 46010003 | T   | C  | intron_variant          | MODIFIER | c.444-206A>G               | ZNF704             | protein_coding | ENSBTAT00000028982  |
| 14 | 46010099 | G   | A  | intron_variant          | MODIFIER | c.444-302C>T               | ZNF704             | protein_coding | ENSBTAT00000028982  |
| 14 | 46010294 | GA  | G  | intron_variant          | MODIFIER | c.444-498delT              | ZNF704             | protein_coding | ENSBTAT00000028982  |
| 14 | 46010367 | C   | T  | intron_variant          | MODIFIER | c.444-570G>A               | ZNF704             | protein_coding | ENSBTAT00000028982  |
| 14 | 46010424 | A   | T  | intron_variant          | MODIFIER | c.444-627T>A               | ZNF704             | protein_coding | ENSBTAT00000028982  |
| 14 | 46010710 | A   | G  | intron_variant          | MODIFIER | c.444-913T>C               | ZNF704             | protein_coding | ENSBTAT00000028982  |
| 14 | 46010716 | C   | T  | intron_variant          | MODIFIER | c.444-919G>A               | ZNF704             | protein_coding | ENSBTAT00000028982  |
| 14 | 46010717 | A   | G  | intron_variant          | MODIFIER | c.444-920T>C               | ZNF704             | protein_coding | ENSBTAT00000028982  |
| 14 | 46010795 | A   | T  | intron_variant          | MODIFIER | c.444-998T>A               | ZNF704             | protein_coding | ENSBTAT00000028982  |
| 14 | 46010802 | GA  | G  | intron_variant          | MODIFIER | c.444-1006delT             | ZNF704             | protein_coding | ENSBTAT00000028982  |
| 14 | 46010832 | G   | A  | intron_variant          | MODIFIER | c.444-1035C>T              | ZNF704             | protein_coding | ENSBTAT00000028982  |
| 14 | 46010961 | A   | C  | intron_variant          | MODIFIER | c.444-1164T>G              | ZNF704             | protein_coding | ENSBTAT00000028982  |
| 14 | 46011199 | A   | C  | intron_variant          | MODIFIER | c.444-1402T>G              | ZNF704             | protein_coding | ENSBTAT00000028982  |
| 14 | 46011426 | T   | C  | intron_variant          | MODIFIER | c.444-1629A>G              | ZNF704             | protein_coding | ENSBTAT00000028982  |
| 14 | 46011521 | T   | G  | intron_variant          | MODIFIER | c.444-1724A>C              | ZNF704             | protein_coding | ENSBTAT00000028982  |
| 14 | 46011763 | G   | A  | intron_variant          | MODIFIER | c.444-1966C>T              | ZNF704             | protein_coding | ENSBTAT00000028982  |
| 14 | 46013672 | G   | A  | intron_variant          | MODIFIER | c.444-3875T>A              | ZNF704             | protein_coding | ENSBTAT00000028982  |
| 14 | 46013738 | G   | A  | intron_variant          | MODIFIER | c.444-3941C>T              | ZNF704             | protein_coding | ENSBTAT00000028982  |
| 14 | 46016920 | G   | A  | intron_variant          | MODIFIER | c.443+1801C>T              | ZNF704             | protein_coding | ENSBTAT00000028982  |
| 14 | 46020537 | C   | T  | intron_variant          | MODIFIER | c.343-1716G>A              | ZNF704             | protein_coding | ENSBTAT00000028982  |
| 14 | 46021000 | T   | G  | intron_variant          | MODIFIER | c.343-2179A>C              | ZNF704             | protein_coding | ENSBTAT00000028982  |
| 14 | 46021460 | C   | T  | intron_variant          | MODIFIER | c.343-2639G>A              | ZNF704             | protein_coding | ENSBTAT00000028982  |
| 14 | 46021525 | T   | C  | intron_variant          | MODIFIER | c.343-2704A>G              | ZNF704             | protein_coding | ENSBTAT00000028982  |
| 14 | 46022330 | A   | C  | intron_variant          | MODIFIER | c.343-3509T>G              | ZNF704             | protein_coding | ENSBTAT00000028982  |

|    |          |    |      |                         |          |                            |        |                |                   |
|----|----------|----|------|-------------------------|----------|----------------------------|--------|----------------|-------------------|
| 14 | 46022818 | A  | G    | intron_variant          | MODIFIER | c.343-3997T>C              | ZNF704 | protein_coding | ENSBTAT0000028982 |
| 14 | 46025661 | C  | A    | intron_variant          | MODIFIER | c.343-6840G>T              | ZNF704 | protein_coding | ENSBTAT0000028982 |
| 14 | 46026718 | G  | A    | intron_variant          | MODIFIER | c.343-7897C>T              | ZNF704 | protein_coding | ENSBTAT0000028982 |
| 14 | 46026741 | G  | C    | intron_variant          | MODIFIER | c.343-7920C>G              | ZNF704 | protein_coding | ENSBTAT0000028982 |
| 14 | 46026862 | CT | C    | intron_variant          | MODIFIER | c.343-8042delA             | ZNF704 | protein_coding | ENSBTAT0000028982 |
| 14 | 46027620 | G  | A    | intron_variant          | MODIFIER | c.342+7485C>T              | ZNF704 | protein_coding | ENSBTAT0000028982 |
| 14 | 46027637 | G  | T    | intron_variant          | MODIFIER | c.342+7468G>A              | ZNF704 | protein_coding | ENSBTAT0000028982 |
| 14 | 46027638 | C  | A    | intron_variant          | MODIFIER | c.342+7467C>T              | ZNF704 | protein_coding | ENSBTAT0000028982 |
| 14 | 46027689 | G  | A    | intron_variant          | MODIFIER | c.342+7416C>T              | ZNF704 | protein_coding | ENSBTAT0000028982 |
| 14 | 46027881 | T  | C    | intron_variant          | MODIFIER | c.342+7224A>G              | ZNF704 | protein_coding | ENSBTAT0000028982 |
| 14 | 46028081 | G  | A    | intron_variant          | MODIFIER | c.342+7024C>T              | ZNF704 | protein_coding | ENSBTAT0000028982 |
| 14 | 46028229 | C  | T    | intron_variant          | MODIFIER | c.342+6876G>A              | ZNF704 | protein_coding | ENSBTAT0000028982 |
| 14 | 46028353 | T  | G    | intron_variant          | MODIFIER | c.342+6752A>C              | ZNF704 | protein_coding | ENSBTAT0000028982 |
| 14 | 46028450 | A  | T    | intron_variant          | MODIFIER | c.342+6655T>A              | ZNF704 | protein_coding | ENSBTAT0000028982 |
| 14 | 46028545 | T  | G    | intron_variant          | MODIFIER | c.342+6560A>C              | ZNF704 | protein_coding | ENSBTAT0000028982 |
| 14 | 46029030 | C  | T    | intron_variant          | MODIFIER | c.342+6075G>A              | ZNF704 | protein_coding | ENSBTAT0000028982 |
| 14 | 46029033 | C  | A    | intron_variant          | MODIFIER | c.342+6072G>T              | ZNF704 | protein_coding | ENSBTAT0000028982 |
| 14 | 46029790 | C  | G    | intron_variant          | MODIFIER | c.342+5315G>C              | ZNF704 | protein_coding | ENSBTAT0000028982 |
| 14 | 46029914 | G  | C    | intron_variant          | MODIFIER | c.342+5191C>G              | ZNF704 | protein_coding | ENSBTAT0000028982 |
| 14 | 46029957 | G  | T    | intron_variant          | MODIFIER | c.342+5148C>A              | ZNF704 | protein_coding | ENSBTAT0000028982 |
| 14 | 46030077 | G  | T    | intron_variant          | MODIFIER | c.342+5028C>A              | ZNF704 | protein_coding | ENSBTAT0000028982 |
| 14 | 46030206 | T  | A    | intron_variant          | MODIFIER | c.342+4899A>T              | ZNF704 | protein_coding | ENSBTAT0000028982 |
| 14 | 46030207 | C  | A    | intron_variant          | MODIFIER | c.342+4898G>T              | ZNF704 | protein_coding | ENSBTAT0000028982 |
| 14 | 46030277 | T  | C    | intron_variant          | MODIFIER | c.342+4828A>G              | ZNF704 | protein_coding | ENSBTAT0000028982 |
| 14 | 46030480 | C  | A    | intron_variant          | MODIFIER | c.342+4625G>T              | ZNF704 | protein_coding | ENSBTAT0000028982 |
| 14 | 46030831 | T  | C    | intron_variant          | MODIFIER | c.342+4274A>G              | ZNF704 | protein_coding | ENSBTAT0000028982 |
| 14 | 46031123 | A  | G    | intron_variant          | MODIFIER | c.342+3982T>C              | ZNF704 | protein_coding | ENSBTAT0000028982 |
| 14 | 46031476 | T  | C    | intron_variant          | MODIFIER | c.342+3629A>G              | ZNF704 | protein_coding | ENSBTAT0000028982 |
| 14 | 46031528 | C  | T    | intron_variant          | MODIFIER | c.342+3577G>A              | ZNF704 | protein_coding | ENSBTAT0000028982 |
| 14 | 46032077 | C  | A    | intron_variant          | MODIFIER | c.342+3028G>T              | ZNF704 | protein_coding | ENSBTAT0000028982 |
| 14 | 46032078 | C  | T    | intron_variant          | MODIFIER | c.342+3027G>A              | ZNF704 | protein_coding | ENSBTAT0000028982 |
| 14 | 46032315 | G  | T    | intron_variant          | MODIFIER | c.342+2790C>A              | ZNF704 | protein_coding | ENSBTAT0000028982 |
| 14 | 46032338 | C  | T    | intron_variant          | MODIFIER | c.342+2767G>A              | ZNF704 | protein_coding | ENSBTAT0000028982 |
| 14 | 46032392 | T  | G    | intron_variant          | MODIFIER | c.342+2713A>C              | ZNF704 | protein_coding | ENSBTAT0000028982 |
| 14 | 46032426 | T  | G    | intron_variant          | MODIFIER | c.342+2679A>C              | ZNF704 | protein_coding | ENSBTAT0000028982 |
| 14 | 46032436 | T  | C    | intron_variant          | MODIFIER | c.342+2669A>G              | ZNF704 | protein_coding | ENSBTAT0000028982 |
| 14 | 46032508 | T  | C    | intron_variant          | MODIFIER | c.342+2597A>G              | ZNF704 | protein_coding | ENSBTAT0000028982 |
| 14 | 46032602 | A  | G    | intron_variant          | MODIFIER | c.342+2503T>C              | ZNF704 | protein_coding | ENSBTAT0000028982 |
| 14 | 46032689 | G  | A    | intron_variant          | MODIFIER | c.342+2416C>T              | ZNF704 | protein_coding | ENSBTAT0000028982 |
| 14 | 46032701 | C  | A    | intron_variant          | MODIFIER | c.342+2404G>T              | ZNF704 | protein_coding | ENSBTAT0000028982 |
| 14 | 46032976 | G  | A    | intron_variant          | MODIFIER | c.342+2129C>T              | ZNF704 | protein_coding | ENSBTAT0000028982 |
| 14 | 46033008 | G  | C    | intron_variant          | MODIFIER | c.342+2097C>G              | ZNF704 | protein_coding | ENSBTAT0000028982 |
| 14 | 46033030 | C  | T    | intron_variant          | MODIFIER | c.342+2075G>A              | ZNF704 | protein_coding | ENSBTAT0000028982 |
| 14 | 46033220 | C  | CA   | intron_variant          | MODIFIER | c.342+1884_342+1885insT    | ZNF704 | protein_coding | ENSBTAT0000028982 |
| 14 | 46033563 | C  | CAG  | intron_variant          | MODIFIER | c.342+1541_342+1542insCT   | ZNF704 | protein_coding | ENSBTAT0000028982 |
| 14 | 46033915 | G  | A    | intron_variant          | MODIFIER | c.342+1190C>T              | ZNF704 | protein_coding | ENSBTAT0000028982 |
| 14 | 46034026 | T  | C    | intron_variant          | MODIFIER | c.342+1079A>G              | ZNF704 | protein_coding | ENSBTAT0000028982 |
| 14 | 46034233 | T  | G    | intron_variant          | MODIFIER | c.342+872A>C               | ZNF704 | protein_coding | ENSBTAT0000028982 |
| 14 | 46034690 | T  | G    | intron_variant          | MODIFIER | c.342+415A>C               | ZNF704 | protein_coding | ENSBTAT0000028982 |
| 14 | 46034730 | GT | G    | intron_variant          | MODIFIER | c.342+374delA              | ZNF704 | protein_coding | ENSBTAT0000028982 |
| 14 | 46034825 | T  | G    | intron_variant          | MODIFIER | c.342+280A>C               | ZNF704 | protein_coding | ENSBTAT0000028982 |
| 14 | 46034917 | T  | C    | intron_variant          | MODIFIER | c.342+188C>G               | ZNF704 | protein_coding | ENSBTAT0000028982 |
| 14 | 46034921 | G  | G    | intron_variant          | MODIFIER | c.342+184A>C               | ZNF704 | protein_coding | ENSBTAT0000028982 |
| 14 | 46035093 | T  | C    | intron_variant          | MODIFIER | c.342+12A>G                | ZNF704 | protein_coding | ENSBTAT0000028982 |
| 14 | 46036188 | T  | C    | intron_variant          | MODIFIER | c.110-851A>G               | ZNF704 | protein_coding | ENSBTAT0000028982 |
| 14 | 46036420 | A  | G    | intron_variant          | MODIFIER | c.110-1083T>C              | ZNF704 | protein_coding | ENSBTAT0000028982 |
| 14 | 46036443 | T  | C    | intron_variant          | MODIFIER | c.110-1106A>G              | ZNF704 | protein_coding | ENSBTAT0000028982 |
| 14 | 46036684 | C  | T    | intron_variant          | MODIFIER | c.110-1347G>A              | ZNF704 | protein_coding | ENSBTAT0000028982 |
| 14 | 46036848 | A  | AAAC | intron_variant          | MODIFIER | c.110-1512_110-1511insGTGT | ZNF704 | protein_coding | ENSBTAT0000028982 |
| 14 | 46036850 | G  | A    | intron_variant          | MODIFIER | c.110-1513C>T              | ZNF704 | protein_coding | ENSBTAT0000028982 |
| 14 | 46036892 | C  | T    | intron_variant          | MODIFIER | c.110-1555G>A              | ZNF704 | protein_coding | ENSBTAT0000028982 |
| 14 | 46036912 | A  | G    | intron_variant          | MODIFIER | c.110-1575T>C              | ZNF704 | protein_coding | ENSBTAT0000028982 |
| 14 | 46036938 | G  | A    | intron_variant          | MODIFIER | c.110-1601C>T              | ZNF704 | protein_coding | ENSBTAT0000028982 |
| 14 | 46037179 | C  | T    | intron_variant          | MODIFIER | c.110-1842G>A              | ZNF704 | protein_coding | ENSBTAT0000028982 |
| 14 | 46037187 | A  | G    | intron_variant          | MODIFIER | c.110-1850T>C              | ZNF704 | protein_coding | ENSBTAT0000028982 |
| 14 | 46037233 | C  | T    | intron_variant          | MODIFIER | c.110-1896G>A              | ZNF704 | protein_coding | ENSBTAT0000028982 |
| 14 | 46037553 | T  | C    | intron_variant          | MODIFIER | c.110-2216A>G              | ZNF704 | protein_coding | ENSBTAT0000028982 |
| 14 | 46037599 | C  | T    | intron_variant          | MODIFIER | c.110-2262G>A              | ZNF704 | protein_coding | ENSBTAT0000028982 |
| 14 | 46037603 | C  | A    | intron_variant          | MODIFIER | c.110-2266G>T              | ZNF704 | protein_coding | ENSBTAT0000028982 |
| 14 | 46037666 | T  | C    | intron_variant          | MODIFIER | c.110-2329A>G              | ZNF704 | protein_coding | ENSBTAT0000028982 |
| 14 | 46037836 | T  | G    | intron_variant          | MODIFIER | c.110-2499A>C              | ZNF704 | protein_coding | ENSBTAT0000028982 |
| 14 | 46037891 | C  | T    | intron_variant          | MODIFIER | c.110-2554G>A              | ZNF704 | protein_coding | ENSBTAT0000028982 |
| 14 | 46038002 | A  | C    | intron_variant          | MODIFIER | c.109+2650T>G              | ZNF704 | protein_coding | ENSBTAT0000028982 |
| 14 | 46038304 | T  | C    | intron_variant          | MODIFIER | c.109+2348A>G              | ZNF704 | protein_coding | ENSBTAT0000028982 |
| 14 | 46038319 | T  | C    | intron_variant          | MODIFIER | c.109+2333A>G              | ZNF704 | protein_coding | ENSBTAT0000028982 |
| 14 | 46038622 | G  | T    | intron_variant          | MODIFIER | c.109+2030C>A              | ZNF704 | protein_coding | ENSBTAT0000028982 |
| 14 | 46038814 | A  | T    | intron_variant          | MODIFIER | c.109+1838T>A              | ZNF704 | protein_coding | ENSBTAT0000028982 |
| 14 | 46038820 | T  | C    | intron_variant          | MODIFIER | c.109+1832A>G              | ZNF704 | protein_coding | ENSBTAT0000028982 |
| 14 | 46038821 | G  | A    | intron_variant          | MODIFIER | c.109+1831C>T              | ZNF704 | protein_coding | ENSBTAT0000028982 |
| 14 | 46039034 | T  | C    | intron_variant          | MODIFIER | c.109+1618A>G              | ZNF704 | protein_coding | ENSBTAT0000028982 |
| 14 | 46039260 | A  | G    | intron_variant          | MODIFIER | c.109+1392T>C              | ZNF704 | protein_coding | ENSBTAT0000028982 |
| 14 | 46039406 | G  | A    | intron_variant          | MODIFIER | c.109+1246C>T              | ZNF704 | protein_coding | ENSBTAT0000028982 |
| 14 | 46039413 | T  | C    | intron_variant          | MODIFIER | c.109+1239A>G              | ZNF704 | protein_coding | ENSBTAT0000028982 |
| 14 | 46039488 | G  | A    | intron_variant          | MODIFIER | c.109+1164C>T              | ZNF704 | protein_coding | ENSBTAT0000028982 |
| 14 | 46039555 | TC | T    | intron_variant          | MODIFIER | c.109+1096delG             | ZNF704 | protein_coding | ENSBTAT0000028982 |
| 14 | 46039603 | A  | G    | intron_variant          | MODIFIER | c.109+1049T>C              | ZNF704 | protein_coding | ENSBTAT0000028982 |
| 14 | 46039656 | C  | T    | intron_variant          | MODIFIER | c.109+996G>A               | ZNF704 | protein_coding | ENSBTAT0000028982 |
| 14 | 46039694 | TC | T    | intron_variant          | MODIFIER | c.109+957delG              | ZNF704 | protein_coding | ENSBTAT0000028982 |
| 14 | 46039745 | C  | T    | intron_variant          | MODIFIER | c.109+907G>A               | ZNF704 | protein_coding | ENSBTAT0000028982 |
| 14 | 46039838 | C  | T    | intron_variant          | MODIFIER | c.109+814G>A               | ZNF704 | protein_coding | ENSBTAT0000028982 |
| 14 | 46040027 | A  | G    | intron_variant          | MODIFIER | c.109+625T>C               | ZNF704 | protein_coding | ENSBTAT0000028982 |
| 14 | 46040421 | A  | C    | intron_variant          | MODIFIER | c.109+231T>G               | ZNF704 | protein_coding | ENSBTAT0000028982 |
| 14 | 46041317 | A  | T    | upstream_gene_variant   | MODIFIER | c.-577T>A                  | ZNF704 | protein_coding | ENSBTAT0000028982 |
| 14 | 46041737 | T  | G    | upstream_gene_variant   | MODIFIER | c.-977A>C                  | ZNF704 | protein_coding | ENSBTAT0000028982 |
| 14 | 46042459 | G  | A    | upstream_gene_variant   | MODIFIER | c.-1699C>T                 | ZNF704 | protein_coding | ENSBTAT0000028982 |
| 14 | 46043072 | G  | C    | upstream_gene_variant   | MODIFIER | c.-2312C>G                 | ZNF704 | protein_coding | ENSBTAT0000028982 |
| 14 | 46043383 | A  | G    | upstream_gene_variant   | MODIFIER | c.-2623T>C                 | ZNF704 | protein_coding | ENSBTAT0000028982 |
| 14 | 46043446 | T  | G    | upstream_gene_variant   | MODIFIER | c.-2686A>C                 | ZNF704 | protein_coding | ENSBTAT0000028982 |
| 14 | 46043588 | T  | C    | upstream_gene_variant   | MODIFIER | c.-2828A>G                 | ZNF704 | protein_coding | ENSBTAT0000028982 |
| 14 | 46043886 | T  | C    | upstream_gene_variant   | MODIFIER | c.-3126A>G                 | ZNF704 | protein_coding | ENSBTAT0000028982 |
| 14 | 46043899 | T  | C    | upstream_gene_variant   | MODIFIER | c.-319A>G                  | ZNF704 | protein_coding | ENSBTAT0000028982 |
| 14 | 46044196 | T  | C    | upstream_gene_variant   | MODIFIER | c.-3436A>G                 | ZNF704 | protein_coding | ENSBTAT0000028982 |
| 14 | 46044335 | A  | G    | upstream_gene_variant   | MODIFIER | c.-3575T>C                 | ZNF704 | protein_coding | ENSBTAT0000028982 |
| 14 | 46044439 | C  | T    | upstream_gene_variant   | MODIFIER | c.-3679G>A                 | ZNF704 | protein_coding | ENSBTAT0000028982 |
| 14 | 46044459 | C  | T    | upstream_gene_variant   | MODIFIER | c.-3699G>A                 | ZNF704 | protein_coding | ENSBTAT0000028982 |
| 14 | 46044793 | G  | C    | upstream_gene_variant   | MODIFIER | c.-4033C>G                 | ZNF704 | protein_coding | ENSBTAT0000028982 |
| 14 | 46044922 | A  | G    | upstream_gene_variant   | MODIFIER | c.-4162T>C                 | ZNF704 | protein_coding | ENSBTAT0000028982 |
| 14 | 46045386 | A  | G    | upstream_gene_variant   | MODIFIER | c.-4626T>C                 | ZNF704 | protein_coding | ENSBTAT0000028982 |
| 14 | 46045522 | G  | A    | upstream_gene_variant   | MODIFIER | c.-4762C>T                 | ZNF704 | protein_coding | ENSBTAT0000028982 |
| 14 | 46045553 | G  | C    | upstream_gene_variant   | MODIFIER | c.-4793C>G                 | ZNF704 | protein_coding | ENSBTAT0000028982 |
| 14 | 46045629 | A  | AC   | upstream_gene_variant   | MODIFIER | c.-4870_4869insG           | ZNF704 | protein_coding | ENSBTAT0000028982 |
| 14 | 46799755 | G  | A    | downstream_gene_variant | MODIFIER | c.*3229C>T                 | PMP2   | protein_coding | ENSBTAT0000046521 |
| 17 | 28634949 | T  | C    | upstream_gene_variant   | MODIFIER | n-2214A>G                  | 75K    | misc_RNA       | ENSBTAT0000060712 |

|    |          |            |    |                                      |          |                                |                    |                |                     |
|----|----------|------------|----|--------------------------------------|----------|--------------------------------|--------------------|----------------|---------------------|
| 17 | 28634973 | A          | G  | upstream_gene_variant                | MODIFIER | n-2238T>C                      | 7SK                | misc_RNA       | ENSBTAT00000060712  |
| 17 | 38028857 | T          | G  | downstream_gene_variant              | MODIFIER | c.*67146T>G                    | ENSBTAG00000047595 | protein_coding | ENSBTAT00000064567  |
| 17 | 52969236 | G          | A  | downstream_gene_variant              | MODIFIER | c.*5947C>T                     | AACS               | protein_coding | ENSBTAT00000070459  |
| 17 | 52970236 | C          | T  | downstream_gene_variant              | MODIFIER | c.*9497G>A                     | AACS               | protein_coding | ENSBTAT00000070459  |
| 17 | 53003481 | G          | A  | intron_variant                       | MODIFIER | c.571-1375C>T                  | AACS               | protein_coding | ENSBTAT00000070459  |
| 17 | 53009053 | G          | A  | intron_variant                       | MODIFIER | c.570+2151C>T                  | AACS               | protein_coding | ENSBTAT00000070459  |
| 17 | 53640197 | C          | T  | intron_variant                       | MODIFIER | c.1286+4889C>T                 | NCOR2              | protein_coding | ENSBTAT00000034273  |
| 17 | 54379369 | C          | T  | intron_variant                       | MODIFIER | c.801+3770C>T                  | RILPL1             | protein_coding | ENSBTAT00000029668  |
| 17 | 54999680 | C          | T  | upstream_gene_variant                | MODIFIER | n-2052G>A                      | SNORA70            | snoRNA         | ENSBTAT00000062459  |
| 17 | 54999680 | C          | T  | intron_variant                       | MODIFIER | c.212-259G>A                   | ENSBTAG00000032433 | protein_coding | ENSBTAT00000045998  |
| 17 | 55636176 | T          | C  | intron_variant                       | MODIFIER | c.1581-632A>G                  | WDR66              | protein_coding | ENSBTAT00000005477  |
| 17 | 56675700 | G          | A  | intron_variant                       | MODIFIER | c.233-4781C>T                  | PPTC7              | protein_coding | ENSBTAT00000023493  |
| 17 | 57292132 | T          | A  | intron_variant                       | MODIFIER | c.301+9483T>A                  | CLUX2              | protein_coding | ENSBTAT00000029615  |
| 17 | 57977763 | G          | A  | intron_variant                       | MODIFIER | c.5209-82G>A                   | CIT                | protein_coding | ENSBTAT00000061505  |
| 17 | 59716009 | C          | T  | intron_variant                       | MODIFIER | c.987-2052C>T                  | KSR2               | protein_coding | ENSBTAT00000061442  |
| 17 | 60092232 | AC         | A  | intron_variant                       | MODIFIER | c.1664+1060delC                | NOS1               | protein_coding | ENSBTAT00000011690  |
| 17 | 60335279 | C          | T  | downstream_gene_variant              | MODIFIER | c.*3729C>T                     | TESC               | protein_coding | ENSBTAT00000061490  |
| 17 | 60335279 | C          | T  | downstream_gene_variant              | MODIFIER | c.*3858G>A                     | FBXW8              | protein_coding | ENSBTAT00000064959  |
| 17 | 60335279 | C          | T  | downstream_gene_variant              | MODIFIER | c.*3858G>A                     | FBXW8              | protein_coding | ENSBTAT00000050675  |
| 18 | 14609330 | C          | T  | upstream_gene_variant                | MODIFIER | c.1437C>T                      | CDK10              | protein_coding | ENSBTAT00000047400  |
| 18 | 14611199 | C          | T  | intron_variant                       | MODIFIER | c.81+352C>T                    | CDK10              | protein_coding | ENSBTAT00000047400  |
| 18 | 14628123 | TTGGGTCACA | A  | intron_variant                       | MODIFIER | c.1282+43_1282+51delTTGGACCC   | VPS9D1             | protein_coding | ENSBTAT00000028205  |
| 18 | 14632547 | C          | T  | upstream_gene_variant                | MODIFIER | c.-2755C>T                     | ZNF276             | protein_coding | ENSBTAT00000002476  |
| 18 | 14632547 | C          | T  | intron_variant                       | MODIFIER | c.175+329G>A                   | VPS9D1             | protein_coding | ENSBTAT00000028205  |
| 18 | 14639106 | A          | G  | upstream_gene_variant                | MODIFIER | c.-4534T>C                     | VPS9D1             | protein_coding | ENSBTAT00000028205  |
| 18 | 14639106 | A          | G  | intron_variant                       | MODIFIER | c.218-699A>G                   | ZNF276             | protein_coding | ENSBTAT00000002476  |
| 18 | 14669751 | C          | A  | intron_variant                       | MODIFIER | c.1718+242G>T                  | FANCA              | protein_coding | ENSBTAT00000002478  |
| 18 | 14673330 | C          | T  | intron_variant                       | MODIFIER | c.1362+301G>A                  | FANCA              | protein_coding | ENSBTAT00000002478  |
| 18 | 14684754 | G          | A  | intron_variant                       | MODIFIER | c.284-398C>T                   | FANCA              | protein_coding | ENSBTAT00000002478  |
| 18 | 14692800 | G          | C  | upstream_gene_variant                | MODIFIER | c.-1652G>C                     | SPIRE2             | protein_coding | ENSBTAT0000001541   |
| 18 | 14692800 | G          | C  | upstream_gene_variant                | MODIFIER | c.-1682G>C                     | SPIRE2             | protein_coding | ENSBTAT00000064626  |
| 18 | 14740292 | T          | TG | upstream_gene_variant                | MODIFIER | c.-1645_-1644insG              | TCF25              | protein_coding | ENSBTAT00000016057  |
| 18 | 14743791 | A          | G  | synonymous_variant                   | LOW      | c.369A>G                       | TCF25              | protein_coding | ENSBTAT00000016057  |
| 18 | 14751873 | G          | A  | intron_variant                       | MODIFIER | c.1278-142G>A                  | TCF25              | protein_coding | ENSBTAT00000016057  |
| 18 | 14756082 | C          | T  | upstream_gene_variant                | MODIFIER | c.-1533C>T                     | MC1R               | protein_coding | ENSBTAT00000032494  |
| 18 | 14756082 | C          | T  | downstream_gene_variant              | MODIFIER | c.*2181C>T                     | TCF25              | protein_coding | ENSBTAT00000016057  |
| 18 | 14796948 | G          | A  | intron_variant                       | MODIFIER | c.139-1948G>A                  | ENSBTAG00000038051 | protein_coding | ENSBTAT00000056979  |
| 18 | 14802791 | A          | G  | intron_variant                       | MODIFIER | c.546+655A>G                   | ENSBTAG00000038051 | protein_coding | ENSBTAT00000056979  |
| 18 | 14802810 | T          | C  | intron_variant                       | MODIFIER | c.546+674T>C                   | ENSBTAG00000038051 | protein_coding | ENSBTAT00000056979  |
| 18 | 14803413 | G          | C  | intron_variant                       | MODIFIER | c.547-861G>C                   | ENSBTAG00000038051 | protein_coding | ENSBTAT00000056979  |
| 18 | 14806770 | G          | A  | intron_variant                       | MODIFIER | c.1011+1041G>A                 | ENSBTAG00000038051 | protein_coding | ENSBTAT00000056979  |
| 18 | 14820167 | C          | T  | downstream_gene_variant              | MODIFIER | c.*4957C>T                     | ENSBTAG00000038051 | protein_coding | ENSBTAT00000056979  |
| 18 | 14820167 | C          | T  | intron_variant                       | MODIFIER | c.32-892G>A                    | DBNDD1             | protein_coding | ENSBTAT00000027077  |
| 18 | 14822098 | G          | A  | intron_variant                       | MODIFIER | c.31+2562C>T                   | DBNDD1             | protein_coding | ENSBTAT00000027077  |
| 18 | 14830472 | C          | CT | intron_variant                       | MODIFIER | c.3+127_3+128insT              | GAS8               | protein_coding | ENSBTAT00000009333  |
| 18 | 14846463 | C          | T  | 3_prime_UTR_variant                  | MODIFIER | c.*263C>T                      | GAS8               | protein_coding | ENSBTAT00000009333  |
| 18 | 14846786 | C          | T  | 3_prime_UTR_variant                  | MODIFIER | c.*586C>T                      | GAS8               | protein_coding | ENSBTAT00000009333  |
| 18 | 14849211 | G          | A  | downstream_gene_variant              | MODIFIER | c.*3371G>A                     | GAS8               | protein_coding | ENSBTAT00000009333  |
| 18 | 14849326 | C          | T  | downstream_gene_variant              | MODIFIER | c.*3486C>T                     | GAS8               | protein_coding | ENSBTAT00000009333  |
| 18 | 14882790 | C          | T  | upstream_gene_variant                | MODIFIER | n-4945G>A                      | UI                 | snRNA          | ENSBTAT00000042019  |
| 18 | 15077671 | T          | A  | upstream_gene_variant                | MODIFIER | c.-822T>A                      | ENSBTAG00000023726 | protein_coding | ENSBTAT00000032490  |
| 18 | 15077671 | T          | A  | downstream_gene_variant              | MODIFIER | c.*2815T>A                     | ORC6               | protein_coding | ENSBTAT00000002438  |
| 18 | 15406139 | C          | A  | downstream_gene_variant              | MODIFIER | c.*1537C>A                     | GPT2               | protein_coding | ENSBTAT00000038881  |
| 19 | 17685195 | A          | G  | intron_variant                       | MODIFIER | c.95+19650A>G                  | MYO1D              | protein_coding | ENSBTAT00000020634  |
| 19 | 17793549 | AT         | A  | intron_variant                       | MODIFIER | c.1297-552delT                 | MYO1D              | protein_coding | ENSBTAT00000020634  |
| 19 | 18272256 | G          | T  | intron_variant                       | MODIFIER | c.1139+538C>A                  | RHOT1              | protein_coding | ENSBTAT00000053318  |
| 19 | 18292007 | C          | G  | intron_variant                       | MODIFIER | c.368+578G>C                   | RHOT1              | protein_coding | ENSBTAT00000053318  |
| 19 | 18397920 | G          | A  | upstream_gene_variant                | MODIFIER | c.-2837G>A                     | C19H1orf42         | protein_coding | ENSBTAT00000024467  |
| 19 | 61710902 | AAAAAG     | A  | intron_variant                       | MODIFIER | c.928-1804_928-1800delCTTTT    | MAP2K6             | protein_coding | ENSBTAT00000002115  |
| 19 | 61710907 | G          | A  | intron_variant                       | MODIFIER | c.928-1804C>T                  | MAP2K6             | protein_coding | ENSBTAT00000002115  |
| 19 | 61748890 | A          | G  | intron_variant                       | MODIFIER | c.17-5190T>C                   | MAP2K6             | protein_coding | ENSBTAT00000002115  |
| 19 | 61777308 | G          | A  | intron_variant                       | MODIFIER | c.17-33608C>T                  | MAP2K6             | protein_coding | ENSBTAT00000002115  |
| 19 | 62274726 | C          | T  | intron_variant                       | MODIFIER | c.356+4098C>T                  | FAM20A             | protein_coding | ENSBTAT00000001439  |
| 21 | 55537362 | T          | G  | intron_variant                       | MODIFIER | c.862+1531A>C                  | TGM5               | protein_coding | ENSBTAT00000045466  |
| 21 | 55625460 | C          | T  | splice_region_variant&intron_variant | LOW      | c.770-8C>T                     | ADAL               | protein_coding | ENSBTAT00000019248  |
| 21 | 55625460 | C          | T  | downstream_gene_variant              | MODIFIER | c.*4898G>A                     | ZSCAN29            | protein_coding | ENSBTAT00000019251  |
| 21 | 55707719 | T          | C  | intron_variant                       | MODIFIER | c.3627+608A>G                  | TP53BP1            | protein_coding | ENSBTAT00000028388  |
| 21 | 55708316 | T          | C  | intron_variant                       | MODIFIER | c.3627+11A>G                   | TP53BP1            | protein_coding | ENSBTAT00000028388  |
| 23 | 11960224 | TAA        | T  | intron_variant                       | MODIFIER | c.113-1005_113-1004delAA       | ZFAND3             | protein_coding | ENSBTAT00000036100  |
| 23 | 12480092 | C          | A  | downstream_gene_variant              | MODIFIER | c.*4750G>T                     | GLO1               | protein_coding | ENSBTAT00000016884  |
| 23 | 12620146 | G          | A  | intron_variant                       | MODIFIER | c.2965-4714G>A                 | DNAH8              | protein_coding | ENSBTAT00000018689  |
| 23 | 12620146 | G          | A  | intron_variant                       | MODIFIER | c.2569-4714G>A                 | DNAH8              | protein_coding | ENSBTAT00000065917  |
| 23 | 12622781 | C          | A  | intron_variant                       | MODIFIER | c.2965-2079C>A                 | DNAH8              | protein_coding | ENSBTAT00000018689  |
| 23 | 12622781 | C          | A  | intron_variant                       | MODIFIER | c.2569-2079C>A                 | DNAH8              | protein_coding | ENSBTAT00000065917  |
| 23 | 12711687 | C          | G  | intron_variant                       | MODIFIER | c.8331+494C>G                  | DNAH8              | protein_coding | ENSBTAT00000018689  |
| 23 | 12711687 | C          | G  | intron_variant                       | MODIFIER | c.7983+494C>G                  | DNAH8              | protein_coding | ENSBTAT00000065917  |
| 23 | 13071905 | G          | A  | intron_variant                       | MODIFIER | c.187-9651C>T                  | CXCN5              | protein_coding | ENSBTAT00000014756  |
| 23 | 13104027 | C          | T  | upstream_gene_variant                | MODIFIER | c.-801G>A                      | ENSBTAG00000007140 | protein_coding | ENSBTAT00000009396  |
| 23 | 13481679 | G          | T  | intron_variant                       | MODIFIER | c.391-1303C>A                  | KIF6               | protein_coding | ENSBTAT00000064002  |
| 23 | 13481679 | G          | T  | intron_variant                       | MODIFIER | c.391-1303C>A                  | KIF6               | protein_coding | ENSBTAT00000009903  |
| 23 | 13481679 | G          | T  | intron_variant                       | MODIFIER | c.391-1303C>A                  | KIF6               | protein_coding | ENSBTAT00000064399  |
| 23 | 13793289 | A          | G  | intron_variant                       | MODIFIER | c.796-394A>G                   | DAAM2              | protein_coding | ENSBTAT00000036988  |
| 24 | 3880273  | T          | C  | intron_variant                       | MODIFIER | c.5333-37941A>G                | ZNF407             | protein_coding | ENSBTAT000000031106 |
| 24 | 4093660  | G          | A  | intron_variant                       | MODIFIER | c.4701-17426C>T                | ZNF407             | protein_coding | ENSBTAT000000031106 |
| 24 | 4150517  | CATT       | C  | intron_variant                       | MODIFIER | c.4700+37021_4700+37023delAAAT | ZNF407             | protein_coding | ENSBTAT000000031106 |
| 24 | 4261031  | G          | A  | upstream_gene_variant                | MODIFIER | c.-5918C>T                     | CNDP1              | protein_coding | ENSBTAT00000028564  |
| 24 | 4553586  | T          | G  | intron_variant                       | MODIFIER | c.1007-4409T>G                 | FBXO15             | protein_coding | ENSBTAT00000012776  |
| 24 | 21008218 | A          | G  | intron_variant                       | MODIFIER | c.338-6697T>C                  | FHOD3              | protein_coding | ENSBTAT00000061003  |
| 24 | 21153591 | G          | A  | downstream_gene_variant              | MODIFIER | n.*1089C>T                     | U6                 | snRNA          | ENSBTAT00000059186  |
| 24 | 21153591 | G          | A  | intron_variant                       | MODIFIER | c.165+18271C>T                 | FHOD3              | protein_coding | ENSBTAT00000061003  |
| 24 | 21171558 | G          | C  | intron_variant                       | MODIFIER | c.165+304C>G                   | FHOD3              | protein_coding | ENSBTAT00000061003  |
| 24 | 21222029 | TC         | T  | frameshift_variant                   | HIGH     | c.1881delG                     | MOCCOS             | protein_coding | ENSBTAT00000063575  |
| 24 | 21222029 | TC         | T  | frameshift_variant                   | HIGH     | c.1782delG                     | MOCCOS             | protein_coding | ENSBTAT00000048768  |
| 24 | 21923967 | T          | A  | downstream_gene_variant              | MODIFIER | c.*2734T>A                     | INO80C             | protein_coding | ENSBTAT00000065749  |
| 24 | 21923967 | T          | A  | downstream_gene_variant              | MODIFIER | c.*2734T>A                     | INO80C             | protein_coding | ENSBTAT00000016489  |
| 24 | 22077117 | A          | G  | upstream_gene_variant                | MODIFIER | c.-3015A>G                     | ZNF24              | protein_coding | ENSBTAT00000013547  |
| 24 | 22077117 | A          | G  | intron_variant                       | MODIFIER | c.1261-10835A>G                | ZNF24              | protein_coding | ENSBTAT00000065887  |
| 24 | 22077117 | A          | G  | intron_variant                       | MODIFIER | c.794+17811T>C                 | ZNF397             | protein_coding | ENSBTAT00000065936  |
| 24 | 22099857 | CA         | C  | upstream_gene_variant                | MODIFIER | c.-4137delT                    | ZNF397             | protein_coding | ENSBTAT00000065936  |
| 24 | 22099857 | CA         | C  | intron_variant                       | MODIFIER | c.-81-487delT                  | ZNF397             | protein_coding | ENSBTAT00000013542  |
| 24 | 22235790 | G          | A  | intron_variant                       | MODIFIER | c.394-1265C>T                  | MAPRE2             | protein_coding | ENSBTAT0000009897   |
| 24 | 22279375 | TC         | T  | intron_variant                       | MODIFIER | c.120-6449delG                 | MAPRE2             | protein_coding | ENSBTAT0000009897   |
| 24 | 22338374 | C          | T  | upstream_gene_variant                | MODIFIER | n-1591G>A                      | 5S_rRNA            | protein_coding | ENSBTAT00000060885  |
| 24 | 24745064 | T          | C  | intron_variant                       | MODIFIER | c.1064-20728T>C                | KLHL14             | protein_coding | ENSBTAT00000026649  |
| 24 | 24745227 | T          | A  | intron_variant                       | MODIFIER | c.1064-20565T>A                | KLHL14             | protein_coding | ENSBTAT00000026649  |
| 24 | 24747332 | G          | A  | intron_variant                       | MODIFIER | c.1064-1846G>A                 | KLHL14             | protein_coding | ENSBTAT00000026649  |
| 24 | 29069651 | A          | G  | intron_variant                       | MODIFIER | c.172+4524A>G                  | CDH2               | protein_coding | ENSBTAT00000028238  |
| 24 | 29069652 | A          | G  | intron_variant                       | MODIFIER | c.172+4524A>G                  | CDH2               | protein_coding | ENSBTAT00000028238  |
| 24 | 29069653 | A          | G  | intron_variant                       | MODIFIER | c.172+4524T>A>G                | CDH2               | protein_coding | ENSBTAT00000028238  |
| 24 | 29069654 | A          | G  | intron_variant                       | MODIFIER | c.172+45248A>G                 | CDH2               | protein_coding | ENSBTAT00000028238  |
| 24 | 30224398 | T          | C  | intron_variant                       | MODIFIER | c.163+20818T>C                 | CHST9              | protein_coding | ENSBTAT00000031067  |
| 24 | 30231236 | T          | C  | intron_variant                       | MODIFIER | c.163+27656T>C                 | CHST9              | protein_coding | ENSBTAT00000031067  |
| 24 | 31055243 | A          | G  | downstream_gene_variant              | MODIFIER | n.*363A>G                      | bt-mir-2380        | miRNA          | ENSBTAT00000062477  |

|    |          |   |   |                         |          |                 |              |                |                   |
|----|----------|---|---|-------------------------|----------|-----------------|--------------|----------------|-------------------|
| 24 | 31055243 | A | G | intron_variant          | MODIFIER | c.232-3475A>G   | SS18         | protein_coding | ENSBTAT0000015327 |
| 24 | 31058279 | C | A | downstream_gene_variant | MODIFIER | n.*3399C>A      | bta-mir-2380 | miRNA          | ENSBTAT0000062477 |
| 24 | 31058279 | C | A | intron_variant          | MODIFIER | c.232-439C>A    | SS18         | protein_coding | ENSBTAT0000015327 |
| 24 | 31778728 | G | T | intron_variant          | MODIFIER | c.220+72614G>T  | ZNF521       | protein_coding | ENSBTAT0000048222 |
| 24 | 31960710 | A | C | intron_variant          | MODIFIER | c.3658+55508A>C | ZNF521       | protein_coding | ENSBTAT0000048222 |
| 24 | 57302555 | C | T | intron_variant          | MODIFIER | c.784-203G>A    | FECH         | protein_coding | ENSBTAT0000008384 |
| 24 | 58149589 | C | T | intron_variant          | MODIFIER | c.5536+767G>A   | ALPK2        | protein_coding | ENSBTAT0000018977 |
| 24 | 58171663 | G | A | intron_variant          | MODIFIER | c.1885-10367C>T | ALPK2        | protein_coding | ENSBTAT0000018977 |
| 24 | 58292677 | C | T | intron_variant          | MODIFIER | c.228-4364C>T   | MALT1        | protein_coding | ENSBTAT0000046385 |
| 27 | 33752338 | G | A | intron_variant          | MODIFIER | c.61-2392G>A    | PLEKHA2      | protein_coding | ENSBTAT0000031486 |
| 27 | 34689026 | C | T | intron_variant          | MODIFIER | c.100-2006C>T   | IDO1         | protein_coding | ENSBTAT0000027449 |
| 27 | 34695686 | T | C | intron_variant          | MODIFIER | c.550-13T>C     | IDO1         | protein_coding | ENSBTAT0000027449 |
| 27 | 35335361 | C | T | intron_variant          | MODIFIER | c.578-36307G>A  | ZMAT4        | protein_coding | ENSBTAT0000047349 |
| 27 | 35338339 | G | A | intron_variant          | MODIFIER | c.578-39285C>T  | ZMAT4        | protein_coding | ENSBTAT0000047349 |
| 27 | 35358557 | C | T | intron_variant          | MODIFIER | c.577+22579G>A  | ZMAT4        | protein_coding | ENSBTAT0000047349 |
| 27 | 35365674 | G | A | intron_variant          | MODIFIER | c.577+15462C>T  | ZMAT4        | protein_coding | ENSBTAT0000047349 |
| 27 | 35418117 | C | T | intron_variant          | MODIFIER | c.193-8821G>A   | ZMAT4        | protein_coding | ENSBTAT0000047349 |
| 27 | 35418155 | C | A | intron_variant          | MODIFIER | c.193-8859G>T   | ZMAT4        | protein_coding | ENSBTAT0000047349 |
