# Supplementary material for: A frameshift mutation in MOCOS is associated with familial renal syndrome (xanthinuria) in Tyrolean Grey cattle
Source: PubMed Central journal article supplement (PMC5139135; doi:10.1186/s12917-016-0904-4), 2016-12-05
Supplement: 12917_2016_904_MOESM3_ESM.pdf [file 12917_2016_904_MOESM3_ESM.pdf]

Additional file 3:

List of private heterozygous variants in annotated genes found in the genome of the sequenced animal.

| Chromosome | Position  | REF | ALT | EFFECT                                         | IMPACT   | CODON           | GENE                       | BIOTYPE              | TRID               |
|------------|-----------|-----|-----|------------------------------------------------|----------|-----------------|----------------------------|----------------------|--------------------|
| 2          | 44565696  | T   | C   | synonymous_variant                             | LOW      | c.882T>C        | NEB                        | protein_coding       | ENSBTAT0000061000  |
| 2          | 44565696  | T   | C   | synonymous_variant                             | LOW      | c.882T>C        | NEB                        | protein_coding       | ENSBTAT0000055345  |
| 2          | 44593113  | C   | G   | synonymous_variant                             | LOW      | c.3462C>G       | NEB                        | protein_coding       | ENSBTAT0000061000  |
| 2          | 44593113  | C   | G   | synonymous_variant                             | LOW      | c.3462C>G       | NEB                        | protein_coding       | ENSBTAT0000055345  |
| 2          | 44620609  | A   | G   | synonymous_variant                             | LOW      | c.7206A>G       | NEB                        | protein_coding       | ENSBTAT0000061000  |
| 2          | 44620609  | A   | G   | synonymous_variant                             | LOW      | c.7206A>G       | NEB                        | protein_coding       | ENSBTAT0000055345  |
| 2          | 44620947  | A   | G   | synonymous_variant                             | LOW      | c.7338A>G       | NEB                        | protein_coding       | ENSBTAT0000061000  |
| 2          | 44620947  | A   | G   | synonymous_variant                             | LOW      | c.7338A>G       | NEB                        | protein_coding       | ENSBTAT0000055345  |
| 2          | 44621016  | T   | C   | synonymous_variant                             | LOW      | c.7407T>C       | NEB                        | protein_coding       | ENSBTAT0000061000  |
| 2          | 44621016  | T   | C   | synonymous_variant                             | LOW      | c.7407T>C       | NEB                        | protein_coding       | ENSBTAT0000055345  |
| 2          | 44621033  | C   | T   | splice_region_variant&intron_variant           | LOW      | c.7416+8C>T     | NEB                        | protein_coding       | ENSBTAT0000061000  |
| 2          | 44621033  | C   | T   | splice_region_variant&intron_variant           | LOW      | c.7416+8C>T     | NEB                        | protein_coding       | ENSBTAT0000055345  |
| 2          | 44624707  | T   | C   | synonymous_variant                             | LOW      | c.7494T>C       | NEB                        | protein_coding       | ENSBTAT0000061000  |
| 2          | 44624707  | T   | C   | synonymous_variant                             | LOW      | c.7494T>C       | NEB                        | protein_coding       | ENSBTAT0000055345  |
| 2          | 44627138  | T   | C   | synonymous_variant                             | LOW      | c.7956T>C       | NEB                        | protein_coding       | ENSBTAT0000061000  |
| 2          | 44627138  | T   | C   | synonymous_variant                             | LOW      | c.7956T>C       | NEB                        | protein_coding       | ENSBTAT0000055345  |
| 2          | 44631045  | G   | A   | synonymous_variant                             | LOW      | c.8958G>A       | NEB                        | protein_coding       | ENSBTAT0000061000  |
| 2          | 44631045  | G   | A   | intron_variant                                 | MODIFIER | c.8874+544G>A   | NEB                        | protein_coding       | ENSBTAT0000055345  |
| 2          | 44634898  | C   | T   | synonymous_variant                             | LOW      | c.9075C>T       | NEB                        | protein_coding       | ENSBTAT0000061000  |
| 2          | 44634898  | C   | T   | intron_variant                                 | MODIFIER | c.8875-4149C>T  | NEB                        | protein_coding       | ENSBTAT0000055345  |
| 2          | 44635982  | C   | T   | synonymous_variant                             | LOW      | c.9180C>T       | NEB                        | protein_coding       | ENSBTAT0000061000  |
| 2          | 44635982  | C   | T   | intron_variant                                 | MODIFIER | c.8875-3065C>T  | NEB                        | protein_coding       | ENSBTAT0000055345  |
| 2          | 44640539  | A   | G   | synonymous_variant                             | LOW      | c.9714A>G       | NEB                        | protein_coding       | ENSBTAT0000061000  |
| 2          | 44640539  | A   | G   | synonymous_variant                             | LOW      | c.8985A>G       | NEB                        | protein_coding       | ENSBTAT0000055345  |
| 2          | 44640585  | A   | C   | synonymous_variant                             | LOW      | c.9760A>C       | NEB                        | protein_coding       | ENSBTAT0000061000  |
| 2          | 44640585  | A   | C   | synonymous_variant                             | LOW      | c.9031A>C       | NEB                        | protein_coding       | ENSBTAT0000055345  |
| 2          | 44640649  | G   | C   | splice_region_variant&intron_variant           | LOW      | c.9816+8G>C     | NEB                        | protein_coding       | ENSBTAT0000061000  |
| 2          | 44640649  | G   | C   | splice_region_variant&intron_variant           | LOW      | c.9087+8G>C     | NEB                        | protein_coding       | ENSBTAT0000055345  |
| 2          | 44647173  | A   | G   | synonymous_variant                             | LOW      | c.10539A>G      | NEB                        | protein_coding       | ENSBTAT0000061000  |
| 2          | 44647173  | A   | G   | synonymous_variant                             | LOW      | c.9810A>G       | NEB                        | protein_coding       | ENSBTAT0000055345  |
| 2          | 44648435  | C   | T   | synonymous_variant                             | LOW      | c.10701C>T      | NEB                        | protein_coding       | ENSBTAT0000061000  |
| 2          | 44648435  | C   | T   | synonymous_variant                             | LOW      | c.9972C>T       | NEB                        | protein_coding       | ENSBTAT0000055345  |
| 2          | 44706644  | G   | A   | splice_region_variant&intron_variant           | LOW      | c.16510-7G>A    | NEB                        | protein_coding       | ENSBTAT0000061000  |
| 2          | 44768187  | A   | C   | synonymous_variant                             | LOW      | c.6831T>G       | RIF1                       | protein_coding       | ENSBTAT0000027997  |
| 3          | 86392279  | C   | G   | upstream_gene_variant                          | MODIFIER | c.-1C>G         | ENSBTAG00000038085         | protein_coding       | ENSBTAT0000051914  |
| 3          | 86392279  | C   | G   | intergenic_region                              | MODIFIER | n.86392279C>G   | C1orf87-ENSBTAG00000038085 | protein_coding       | ENSBTAT00000018261 |
| 5          | 25778440  | C   | A   | synonymous_variant                             | LOW      | c.183C>A        | ITGA5                      | protein_coding       | ENSBTAT0000045265  |
| 5          | 45203368  | G   | A   | 5_prime_UTR_variant                            | MODIFIER | c.-134C>T       | MDM2                       | protein_coding       | ENSBTAT0000021013  |
| 7          | 2593118   | C   | A   | 5_prime_UTR_variant                            | MODIFIER | c.-1967G>T      | ENSBTAG0000001604          | protein_coding       | ENSBTAT0000064948  |
| 7          | 15649741  | T   | C   | synonymous_variant                             | LOW      | c.2058T>C       | ENSBTAG00000047507         | protein_coding       | ENSBTAT0000059759  |
| 9          | 50907637  | T   | A   | splice_region_variant&non_coding_exon_variant  | LOW      | n.102A>T        | U6                         | snRNA                | ENSBTAT0000020164  |
| 10         | 12448140  | A   | G   | 5_prime_UTR_premature_start_codon_gain_variant | LOW      | c.-272T>C       | VWA9                       | protein_coding       | ENSBTAT0000015763  |
| 10         | 12448140  | A   | G   | 5_prime_UTR_variant                            | MODIFIER | c.-272T>C       | VWA9                       | protein_coding       | ENSBTAT0000020797  |
| 11         | 1774450   | G   | A   | intron_variant                                 | MODIFIER | c.274-1507G>A   | MALL                       | protein_coding       | ENSBTAT0000001130  |
| 11         | 2340729   | A   | G   | 3_prime_UTR_variant                            | MODIFIER | c.*778A>G       | C1A01                      | protein_coding       | ENSBTAT0000001130  |
| 11         | 2340729   | A   | G   | downstream_gene_variant                        | MODIFIER | c.*2525T>C      | SNRNP200                   | protein_coding       | ENSBTAT0000001130  |
| 11         | 2340776   | G   | A   | 3_prime_UTR_variant                            | MODIFIER | c.*825G>A       | C1A01                      | protein_coding       | ENSBTAT0000001130  |
| 11         | 2340776   | G   | A   | downstream_gene_variant                        | MODIFIER | c.*2478C>T      | SNRNP200                   | protein_coding       | ENSBTAT0000001130  |
| 11         | 2340779   | C   | T   | 3_prime_UTR_variant                            | MODIFIER | c.*828C>T       | C1A01                      | protein_coding       | ENSBTAT0000001130  |
| 11         | 2340779   | C   | T   | downstream_gene_variant                        | MODIFIER | c.*2475G>A      | SNRNP200                   | protein_coding       | ENSBTAT0000001130  |
| 11         | 2341033   | T   | C   | 3_prime_UTR_variant                            | MODIFIER | c.*1082T>C      | C1A01                      | protein_coding       | ENSBTAT0000001130  |
| 11         | 2341033   | T   | C   | downstream_gene_variant                        | MODIFIER | c.*2221A>G      | SNRNP200                   | protein_coding       | ENSBTAT0000001130  |
| 11         | 2341044   | T   | A   | 3_prime_UTR_variant                            | MODIFIER | c.*1093T>A      | C1A01                      | protein_coding       | ENSBTAT0000001130  |
| 11         | 2341044   | T   | A   | downstream_gene_variant                        | MODIFIER | c.*2210A>T      | SNRNP200                   | protein_coding       | ENSBTAT0000001130  |
| 11         | 2341057   | G   | A   | 3_prime_UTR_variant                            | MODIFIER | c.*1106G>A      | C1A01                      | protein_coding       | ENSBTAT0000001130  |
| 11         | 2341057   | G   | A   | downstream_gene_variant                        | MODIFIER | c.*2197C>T      | SNRNP200                   | protein_coding       | ENSBTAT0000001130  |
| 11         | 2345065   | A   | C   | splice_region_variant&intron_variant           | LOW      | c.5755-5T>G     | SNRNP200                   | protein_coding       | ENSBTAT0000001130  |
| 11         | 2345065   | A   | C   | downstream_gene_variant                        | MODIFIER | c.*5114A>C      | C1A01                      | protein_coding       | ENSBTAT0000049472  |
| 11         | 2390619   | T   | C   | upstream_gene_variant                          | MODIFIER | c.-4140T>C      | ITPR1L1                    | protein_coding       | ENSBTAT0000047659  |
| 11         | 2390619   | T   | C   | non_coding_exon_variant                        | MODIFIER | n.276T>C        | ENSBTAG00000047659         | processed_pseudogene | ENSBTAT0000049472  |
| 11         | 2390688   | A   | G   | upstream_gene_variant                          | MODIFIER | c.-4071A>G      | ITPR1L1                    | protein_coding       | ENSBTAT000005351   |
| 11         | 2390688   | A   | G   | non_coding_exon_variant                        | MODIFIER | n.345A>G        | ENSBTAG00000047659         | processed_pseudogene | ENSBTAT000005351   |
| 11         | 2390800   | G   | A   | upstream_gene_variant                          | MODIFIER | c.-3959G>A      | ITPR1L1                    | protein_coding       | ENSBTAT0000049472  |
| 11         | 2390800   | G   | A   | downstream_gene_variant                        | MODIFIER | n.*1G>A         | ENSBTAG00000047659         | processed_pseudogene | ENSBTAT000005351   |
| 11         | 2390800   | G   | A   | intergenic_region                              | MODIFIER | n.2390800G>A    | ENSBTAG00000047659-ITPR1L1 | protein_coding       | ENSBTAT0000020468  |
| 11         | 86203078  | C   | T   | synonymous_variant                             | LOW      | c.5337G>A       | GREB1                      | protein_coding       | ENSBTAT0000016564  |
| 11         | 99318281  | G   | A   | 3_prime_UTR_variant                            | MODIFIER | c.*20G>A        | ENDOG                      | protein_coding       | ENSBTAT0000016565  |
| 11         | 99318281  | G   | A   | downstream_gene_variant                        | MODIFIER | c.*134C>T       | C9orf114                   | protein_coding       | ENSBTAT0000064693  |
| 11         | 103669650 | T   | C   | 3_prime_UTR_variant                            | MODIFIER | c.*328A>G       | C9orf69                    | protein_coding       | ENSBTAT0000064693  |
| 11         | 103669915 | C   | T   | 3_prime_UTR_variant                            | MODIFIER | c.*63G>A        | C9orf69                    | protein_coding       | ENSBTAT0000042859  |
| 11         | 103758547 | G   | A   | synonymous_variant                             | LOW      | c.555C>T        | QSOX2                      | protein_coding       | ENSBTAT0000026195  |
| 12         | 79483263  | G   | T   | splice_region_variant&intron_variant           | LOW      | c.13-3C>A       | STK24                      | protein_coding       | ENSBTAT0000028197  |
| 14         | 18244110  | T   | G   | synonymous_variant                             | LOW      | c.1917A>C       | TBC1D31                    | protein_coding       | ENSBTAT0000063409  |
| 14         | 65346798  | C   | T   | 3_prime_UTR_variant                            | MODIFIER | c.*1191C>T      | MGC133632                  | protein_coding       | ENSBTAT0000010595  |
| 14         | 65346798  | C   | T   | downstream_gene_variant                        | MODIFIER | c.*1867C>T      | MGC133632                  | protein_coding       | ENSBTAT0000007451  |
| 15         | 48701749  | C   | T   | synonymous_variant                             | LOW      | c.1749C>T       | UBQLNL                     | protein_coding       | ENSBTAT0000035442  |
| 15         | 48701749  | C   | T   | upstream_gene_variant                          | MODIFIER | c.-5270C>T      | UBQLN3                     | protein_coding       | ENSBTAT0000012676  |
| 16         | 52336513  | T   | C   | 3_prime_UTR_variant                            | MODIFIER | c.*306A>G       | ATAD3                      | protein_coding       | ENSBTAT0000065289  |
| 16         | 52336513  | T   | C   | downstream_gene_variant                        | MODIFIER | c.*1008T>C      | C16H1orf70                 | protein_coding       | ENSBTAT0000052281  |
| 16         | 52336513  | T   | C   | intron_variant                                 | MODIFIER | c.-119-35577A>G | ENSBTAG00000039728         | protein_coding       | ENSBTAT000009885   |
| 17         | 45511670  | C   | T   | upstream_gene_variant                          | MODIFIER | c.-352G>A       | PXMP2                      | protein_coding       | ENSBTAT0000059869  |
| 17         | 45511670  | C   | T   | downstream_gene_variant                        | MODIFIER | n.*1874G>A      | U6                         | snRNA                | ENSBTAT0000018957  |
| 18         | 13038986  | G   | A   | synonymous_variant                             | LOW      | c.1299C>T       | ZCCHC14                    | protein_coding       | ENSBTAT0000032494  |
| 18         | 14753761  | G   | T   | upstream_gene_variant                          | MODIFIER | c.-3854G>T      | MC1R                       | protein_coding       | ENSBTAT00000061463 |
| 19         | 58500769  | C   | T   | splice_region_variant&intron_variant           | LOW      | c.1540-3C>T     | SDK2                       | protein_coding       | ENSBTAT000001888   |
| 25         | 7730597   | C   | T   | 3_prime_UTR_variant                            | MODIFIER | c.*1088C>T      | PMM2                       | protein_coding       | ENSBTAT0000001890  |
| 25         | 7730597   | C   | T   | downstream_gene_variant                        | MODIFIER | c.*4239G>A      | CARHSP1                    | protein_coding       | ENSBTAT0000023357  |
| 27         | 25556114  | C   | T   | non_coding_exon_variant                        | MODIFIER | n.268G>A        | ENSBTAG00000017570         | pseudogene           | ENSBTAT0000054548  |
| 28         | 42584826  | C   | T   | non_coding_exon_variant                        | MODIFIER | n.179C>T        | ENSBTAG00000039154         | pseudogene           | ENSBTAT0000054548  |
| 28         | 42585051  | C   | T   | non_coding_exon_variant                        | MODIFIER | n.404C>T        | ENSBTAG00000039154         | pseudogene           | ENSBTAT0000054548  |
| 28         | 42585060  | G   | C   | non_coding_exon_variant                        | MODIFIER | n.413G>C        | ENSBTAG00000039154         | pseudogene           | ENSBTAT0000054548  |
| 28         | 42585151  | T   | C   | non_coding_exon_variant                        | MODIFIER | n.504T>C        | ENSBTAG00000039154         | pseudogene           | ENSBTAT0000054548  |
| 28         | 42585310  | A   | G   | non_coding_exon_variant                        | MODIFIER | n.663A>G        | ENSBTAG00000039154         | pseudogene           | ENSBTAT0000054548  |
| 29         | 40703234  | G   | T   | synonymous_variant                             | LOW      | c.867C>A        | SYT7                       | protein_coding       | ENSBTAT0000030178  |
| X          | 80816218  | A   | G   | synonymous_variant                             | LOW      | c.240A>G        | ZDHC15                     | protein_coding       | ENSBTAT0000010589  |
